# Supplementary material
Source: publisher figshare collection journal article supplement (https://sage.figshare.com/ndownloader/files/14569520)
Supplement: Supplementary file 1 [file 14569520]

## Sheet: Sheet1
GO biological process complete	Homo sapiens - REFLIST (20972)	Observed gene count	expected gene count	over/under-representation	fold Enrichment	P-value
regulation of transforming growth factor beta2 production (GO:0032909)	8	5	0.09	+	53.72	0.00044
entry of bacterium into host cell (GO:0035635)	12	7	0.14	+	50.14	1.42e-06
positive regulation of metallopeptidase activity (GO:1905050)	7	4	0.08	+	49.11	0.0142
activation of protein kinase A activity (GO:0034199)	17	9	0.2	+	45.5	7.87e-09
lung-associated mesenchyme development (GO:0060484)	10	5	0.12	+	42.98	0.00132
DNA damage induced protein phosphorylation (GO:0006975)	8	4	0.09	+	42.98	0.0241
Bergmann glial cell differentiation (GO:0060020)	8	4	0.09	+	42.98	0.0241
collagen-activated signaling pathway (GO:0038065)	12	6	0.14	+	42.98	7.31e-05
collagen-activated tyrosine kinase receptor signaling pathway (GO:0038063)	10	5	0.12	+	42.98	0.00132
stress-induced premature senescence (GO:0090400)	8	4	0.09	+	42.98	0.0241
replicative senescence (GO:0090399)	12	6	0.14	+	42.98	7.31e-05
forebrain neuroblast division (GO:0021873)	8	4	0.09	+	42.98	0.0241
trachea morphogenesis (GO:0060439)	11	5	0.13	+	39.07	0.0021
regulation of helicase activity (GO:0051095)	9	4	0.1	+	38.2	0.0382
membranous septum morphogenesis (GO:0003149)	9	4	0.1	+	38.2	0.0382
positive regulation of pri-miRNA transcription from RNA polymerase II promoter (GO:1902895)	20	8	0.23	+	34.38	1.32e-06
eyelid development in camera-type eye (GO:0061029)	13	5	0.15	+	33.06	0.00475
DNA damage response, signal transduction by p53 class mediator resulting in transcription of p21 class mediator (GO:0006978)	16	6	0.19	+	32.23	0.000395
trachea development (GO:0060438)	19	7	0.22	+	31.67	3.3e-05
beta-catenin-TCF complex assembly (GO:1904837)	30	11	0.35	+	31.52	1.17e-09
ERBB2 signaling pathway (GO:0038128)	39	14	0.45	+	30.85	7.01e-13
vascular endothelial growth factor signaling pathway (GO:0038084)	14	5	0.16	+	30.7	0.00682
cAMP biosynthetic process (GO:0006171)	17	6	0.2	+	30.34	0.000563
DNA damage response, signal transduction resulting in transcription (GO:0042772)	17	6	0.2	+	30.34	0.000563
cellular response to gamma radiation (GO:0071480)	26	9	0.3	+	29.75	3.29e-07
positive regulation of glucose import in response to insulin stimulus (GO:2001275)	15	5	0.17	+	28.65	0.00954
ectodermal placode development (GO:0071696)	15	5	0.17	+	28.65	0.00954
outflow tract septum morphogenesis (GO:0003148)	21	7	0.24	+	28.65	6.52e-05
regulation of pri-miRNA transcription from RNA polymerase II promoter (GO:1902893)	28	9	0.33	+	27.63	6.28e-07
phosphatidylinositol-3-phosphate biosynthetic process (GO:0036092)	50	16	0.58	+	27.5	2.53e-14
beta-catenin destruction complex disassembly (GO:1904886)	22	7	0.26	+	27.35	8.95e-05
regulation of glucose import in response to insulin stimulus (GO:2001273)	19	6	0.22	+	27.14	0.00108
positive regulation of neuroblast proliferation (GO:0002052)	19	6	0.22	+	27.14	0.00108
renal water homeostasis (GO:0003091)	35	11	0.41	+	27.01	6.05e-09
regulation of bicellular tight junction assembly (GO:2000810)	16	5	0.19	+	26.86	0.013
positive regulation of oligodendrocyte differentiation (GO:0048714)	16	5	0.19	+	26.86	0.013
retina vasculature development in camera-type eye (GO:0061298)	16	5	0.19	+	26.86	0.013
epidermal growth factor receptor signaling pathway (GO:0007173)	58	18	0.67	+	26.67	3.25e-16
cellular response to vascular endothelial growth factor stimulus (GO:0035924)	29	9	0.34	+	26.67	8.53e-07
intrinsic apoptotic signaling pathway in response to DNA damage by p53 class mediator (GO:0042771)	30	9	0.35	+	25.79	1.15e-06
regulation of transforming growth factor beta production (GO:0071634)	27	8	0.31	+	25.47	1.36e-05
astrocyte differentiation (GO:0048708)	44	13	0.51	+	25.39	1.04e-10
negative regulation of anoikis (GO:2000811)	17	5	0.2	+	25.28	0.0175
retinoic acid receptor signaling pathway (GO:0048384)	17	5	0.2	+	25.28	0.0175
positive regulation of phosphatidylinositol 3-kinase activity (GO:0043552)	31	9	0.36	+	24.95	1.52e-06
positive regulation of mesenchymal cell proliferation (GO:0002053)	28	8	0.33	+	24.56	1.8e-05
regulation of phosphatidylinositol 3-kinase activity (GO:0043551)	43	12	0.5	+	23.99	2.13e-09
cellular response to glucagon stimulus (GO:0071377)	40	11	0.47	+	23.64	2.5e-08
bone growth (GO:0098868)	22	6	0.26	+	23.44	0.00252
somatic stem cell division (GO:0048103)	22	6	0.26	+	23.44	0.00252
regulation of neuroblast proliferation (GO:1902692)	26	7	0.3	+	23.14	0.000277
hair follicle morphogenesis (GO:0031069)	26	7	0.3	+	23.14	0.000277
regulation of oligodendrocyte differentiation (GO:0048713)	30	8	0.35	+	22.92	3.06e-05
positive regulation of lipid kinase activity (GO:0090218)	34	9	0.4	+	22.75	3.39e-06
growth hormone receptor signaling pathway (GO:0060396)	19	5	0.22	+	22.62	0.0299
regulation of endothelial cell chemotaxis (GO:2001026)	19	5	0.22	+	22.62	0.0299
paraxial mesoderm development (GO:0048339)	19	5	0.22	+	22.62	0.0299
positive regulation of erythrocyte differentiation (GO:0045648)	23	6	0.27	+	22.42	0.00326
astrocyte development (GO:0014002)	27	7	0.31	+	22.28	0.000357
positive regulation of cellular response to insulin stimulus (GO:1900078)	27	7	0.31	+	22.28	0.000357
vascular endothelial growth factor receptor signaling pathway (GO:0048010)	74	19	0.86	+	22.07	9.3e-16
positive regulation of epithelial to mesenchymal transition (GO:0010718)	39	10	0.45	+	22.04	4.84e-07
ERBB signaling pathway (GO:0038127)	82	21	0.95	+	22.01	1.11e-17
peptidyl-tyrosine autophosphorylation (GO:0038083)	47	12	0.55	+	21.94	5.96e-09
response to gamma radiation (GO:0010332)	55	14	0.64	+	21.88	7.32e-11
Wnt signaling pathway, calcium modulating pathway (GO:0007223)	36	9	0.42	+	21.49	5.56e-06
regulation of lipid kinase activity (GO:0043550)	52	13	0.6	+	21.49	8.42e-10
regulation of mesenchymal cell proliferation (GO:0010464)	36	9	0.42	+	21.49	5.56e-06
response to X-ray (GO:0010165)	32	8	0.37	+	21.49	5.03e-05
positive regulation of glial cell differentiation (GO:0045687)	32	8	0.37	+	21.49	5.03e-05
cellular response to growth hormone stimulus (GO:0071378)	20	5	0.23	+	21.49	0.0383
regulation of anoikis (GO:2000209)	24	6	0.28	+	21.49	0.00416
tongue development (GO:0043586)	20	5	0.23	+	21.49	0.0383
regulation of cholesterol efflux (GO:0010874)	20	5	0.23	+	21.49	0.0383
positive regulation of cardiac muscle hypertrophy (GO:0010613)	24	6	0.28	+	21.49	0.00416
endochondral bone growth (GO:0003416)	20	5	0.23	+	21.49	0.0383
positive regulation of muscle hypertrophy (GO:0014742)	24	6	0.28	+	21.49	0.00416
intrinsic apoptotic signaling pathway in response to DNA damage (GO:0008630)	65	16	0.76	+	21.16	1.44e-12
phosphatidylinositol 3-kinase signaling (GO:0014065)	29	7	0.34	+	20.75	0.000578
branching involved in blood vessel morphogenesis (GO:0001569)	29	7	0.34	+	20.75	0.000578
epidermis morphogenesis (GO:0048730)	29	7	0.34	+	20.75	0.000578
cGMP biosynthetic process (GO:0006182)	25	6	0.29	+	20.63	0.00527
response to cholesterol (GO:0070723)	21	5	0.24	+	20.46	0.0485
adrenal gland development (GO:0030325)	21	5	0.24	+	20.46	0.0485
cell surface receptor signaling pathway involved in heart development (GO:0061311)	21	5	0.24	+	20.46	0.0485
labyrinthine layer morphogenesis (GO:0060713)	21	5	0.24	+	20.46	0.0485
atrioventricular valve morphogenesis (GO:0003181)	21	5	0.24	+	20.46	0.0485
phosphatidylinositol phosphorylation (GO:0046854)	101	24	1.18	+	20.42	7.38e-20
regulation of heart morphogenesis (GO:2000826)	34	8	0.4	+	20.22	8.01e-05
regulation of animal organ formation (GO:0003156)	34	8	0.4	+	20.22	8.01e-05
regulation of phosphatidylinositol 3-kinase signaling (GO:0014066)	146	34	1.7	+	20.02	4.13e-29
epithelial tube branching involved in lung morphogenesis (GO:0060441)	26	6	0.3	+	19.83	0.0066
mesodermal cell differentiation (GO:0048333)	26	6	0.3	+	19.83	0.0066
positive regulation of stem cell proliferation (GO:2000648)	35	8	0.41	+	19.65	0.0001
positive regulation of phospholipid metabolic process (GO:1903727)	44	10	0.51	+	19.53	1.54e-06
cellular senescence (GO:0090398)	31	7	0.36	+	19.41	0.000903
cardiac atrium morphogenesis (GO:0003209)	31	7	0.36	+	19.41	0.000903
response to glucagon (GO:0033762)	49	11	0.57	+	19.3	2.13e-07
ventricular septum morphogenesis (GO:0060412)	36	8	0.42	+	19.1	0.000124
regulation of cardiac muscle cell proliferation (GO:0060043)	36	8	0.42	+	19.1	0.000124
cellular extravasation (GO:0045123)	27	6	0.31	+	19.1	0.0082
negative regulation of lipid transport (GO:0032369)	27	6	0.31	+	19.1	0.0082
axis elongation (GO:0003401)	27	6	0.31	+	19.1	0.0082
epithelial cell apoptotic process (GO:1904019)	27	6	0.31	+	19.1	0.0082
activation of adenylate cyclase activity (GO:0007190)	37	8	0.43	+	18.58	0.000153
regulation of phospholipid metabolic process (GO:1903725)	65	14	0.76	+	18.51	6.85e-10
positive regulation of nitric oxide biosynthetic process (GO:0045429)	42	9	0.49	+	18.42	2.1e-05
positive regulation of nitric oxide metabolic process (GO:1904407)	42	9	0.49	+	18.42	2.1e-05
lipid phosphorylation (GO:0046834)	113	24	1.31	+	18.26	9.67e-19
positive regulation of phosphatidylinositol 3-kinase signaling (GO:0014068)	66	14	0.77	+	18.23	8.4e-10
regulation of cellular response to insulin stimulus (GO:1900076)	66	14	0.77	+	18.23	8.4e-10
positive regulation of neural precursor cell proliferation (GO:2000179)	43	9	0.5	+	17.99	2.57e-05
phosphatidylinositol-mediated signaling (GO:0048015)	130	27	1.51	+	17.85	3.39e-21
salivary gland morphogenesis (GO:0007435)	29	6	0.34	+	17.78	0.0123
neuroblast proliferation (GO:0007405)	29	6	0.34	+	17.78	0.0123
mammary gland epithelium development (GO:0061180)	58	12	0.67	+	17.78	6.64e-08
cellular response to ionizing radiation (GO:0071479)	63	13	0.73	+	17.74	9.12e-09
inositol lipid-mediated signaling (GO:0048017)	131	27	1.52	+	17.72	4.13e-21
positive regulation of heart growth (GO:0060421)	34	7	0.4	+	17.7	0.00167
animal organ formation (GO:0048645)	34	7	0.4	+	17.7	0.00167
hair follicle development (GO:0001942)	73	15	0.85	+	17.66	1.71e-10
B cell activation involved in immune response (GO:0002312)	39	8	0.45	+	17.63	0.000228
digestive tract morphogenesis (GO:0048546)	49	10	0.57	+	17.54	4.28e-06
regulation of insulin receptor signaling pathway (GO:0046626)	49	10	0.57	+	17.54	4.28e-06
positive regulation of neuron death (GO:1901216)	75	15	0.87	+	17.19	2.51e-10
cardiac atrium development (GO:0003230)	35	7	0.41	+	17.19	0.00203
cell aging (GO:0007569)	65	13	0.76	+	17.19	1.34e-08
heart valve morphogenesis (GO:0003179)	35	7	0.41	+	17.19	0.00203
lung morphogenesis (GO:0060425)	45	9	0.52	+	17.19	3.79e-05
regulation of endothelial cell differentiation (GO:0045601)	30	6	0.35	+	17.19	0.015
positive regulation of cardiac muscle tissue growth (GO:0055023)	30	6	0.35	+	17.19	0.015
negative regulation of insulin receptor signaling pathway (GO:0046627)	30	6	0.35	+	17.19	0.015
negative regulation of epidermal growth factor receptor signaling pathway (GO:0042059)	40	8	0.47	+	17.19	0.000277
mammary gland duct morphogenesis (GO:0060603)	30	6	0.35	+	17.19	0.015
hair cycle process (GO:0022405)	76	15	0.88	+	16.96	3.04e-10
molting cycle process (GO:0022404)	76	15	0.88	+	16.96	3.04e-10
cardiac septum morphogenesis (GO:0060411)	61	12	0.71	+	16.91	1.18e-07
positive regulation of cyclase activity (GO:0031281)	61	12	0.71	+	16.91	1.18e-07
mesoderm formation (GO:0001707)	67	13	0.78	+	16.68	1.95e-08
dopaminergic neuron differentiation (GO:0071542)	31	6	0.36	+	16.64	0.0181
response to interleukin-6 (GO:0070741)	31	6	0.36	+	16.64	0.0181
regulation of cellular response to heat (GO:1900034)	78	15	0.91	+	16.53	4.39e-10
organ growth (GO:0035265)	73	14	0.85	+	16.48	3.21e-09
positive regulation of gliogenesis (GO:0014015)	47	9	0.55	+	16.46	5.49e-05
multicellular organismal water homeostasis (GO:0050891)	63	12	0.73	+	16.37	1.7e-07
positive regulation of glucose import (GO:0046326)	42	8	0.49	+	16.37	0.000401
positive regulation of smooth muscle cell proliferation (GO:0048661)	74	14	0.86	+	16.26	3.84e-09
hair cycle (GO:0042633)	90	17	1.05	+	16.24	1.18e-11
molting cycle (GO:0042303)	90	17	1.05	+	16.24	1.18e-11
mesoderm morphogenesis (GO:0048332)	69	13	0.8	+	16.19	2.8e-08
positive regulation of adenylate cyclase activity (GO:0045762)	48	9	0.56	+	16.12	6.57e-05
somatic diversification of immune receptors via germline recombination within a single locus (GO:0002562)	32	6	0.37	+	16.12	0.0216
regulation of telomerase activity (GO:0051972)	48	9	0.56	+	16.12	6.57e-05
stem cell division (GO:0017145)	32	6	0.37	+	16.12	0.0216
platelet-derived growth factor receptor signaling pathway (GO:0048008)	32	6	0.37	+	16.12	0.0216
somatic cell DNA recombination (GO:0016444)	32	6	0.37	+	16.12	0.0216
regulation of cardiac muscle tissue growth (GO:0055021)	48	9	0.56	+	16.12	6.57e-05
negative regulation of cellular response to insulin stimulus (GO:1900077)	32	6	0.37	+	16.12	0.0216
regulation of heart growth (GO:0060420)	54	10	0.63	+	15.92	1.08e-05
outflow tract morphogenesis (GO:0003151)	65	12	0.76	+	15.87	2.43e-07
platelet activation (GO:0030168)	141	26	1.64	+	15.85	4.99e-19
positive regulation of reactive oxygen species biosynthetic process (GO:1903428)	49	9	0.57	+	15.79	7.83e-05
salivary gland development (GO:0007431)	33	6	0.38	+	15.63	0.0258
cGMP metabolic process (GO:0046068)	33	6	0.38	+	15.63	0.0258
cyclic purine nucleotide metabolic process (GO:0052652)	33	6	0.38	+	15.63	0.0258
mesenchyme morphogenesis (GO:0072132)	44	8	0.51	+	15.63	0.00057
positive regulation of reactive oxygen species metabolic process (GO:2000379)	88	16	1.02	+	15.63	1.45e-10
skin epidermis development (GO:0098773)	83	15	0.97	+	15.53	1.06e-09
prostate gland development (GO:0030850)	39	7	0.45	+	15.43	0.00416
heart valve development (GO:0003170)	39	7	0.45	+	15.43	0.00416
positive regulation of DNA replication (GO:0045740)	56	10	0.65	+	15.35	1.52e-05
regulation of glial cell differentiation (GO:0045685)	56	10	0.65	+	15.35	1.52e-05
positive regulation of protein import into nucleus (GO:0042307)	101	18	1.18	+	15.32	4.54e-12
cyclic nucleotide biosynthetic process (GO:0009190)	34	6	0.4	+	15.17	0.0305
positive regulation of glucose metabolic process (GO:0010907)	34	6	0.4	+	15.17	0.0305
water homeostasis (GO:0030104)	68	12	0.79	+	15.17	4.05e-07
cellular response to alcohol (GO:0097306)	57	10	0.66	+	15.08	1.79e-05
negative regulation of lipid localization (GO:1905953)	40	7	0.47	+	15.04	0.00492
positive regulation of cardiac muscle tissue development (GO:0055025)	40	7	0.47	+	15.04	0.00492
positive regulation of protein import (GO:1904591)	103	18	1.2	+	15.02	6.33e-12
sprouting angiogenesis (GO:0002040)	46	8	0.54	+	14.95	0.000798
positive regulation of glucose transport (GO:0010828)	46	8	0.54	+	14.95	0.000798
positive regulation of organ growth (GO:0046622)	46	8	0.54	+	14.95	0.000798
canonical Wnt signaling pathway (GO:0060070)	93	16	1.08	+	14.79	3.35e-10
positive regulation of epidermis development (GO:0045684)	35	6	0.41	+	14.73	0.036
cAMP metabolic process (GO:0046058)	35	6	0.41	+	14.73	0.036
positive regulation of endothelial cell proliferation (GO:0001938)	70	12	0.81	+	14.73	5.61e-07
regulation of polysaccharide biosynthetic process (GO:0032885)	35	6	0.41	+	14.73	0.036
embryonic digestive tract development (GO:0048566)	35	6	0.41	+	14.73	0.036
platelet aggregation (GO:0070527)	41	7	0.48	+	14.67	0.00579
regulation of cardiac muscle hypertrophy (GO:0010611)	41	7	0.48	+	14.67	0.00579
positive regulation of DNA biosynthetic process (GO:2000573)	65	11	0.76	+	14.55	4.04e-06
myoblast differentiation (GO:0045445)	36	6	0.42	+	14.33	0.0422
embryonic axis specification (GO:0000578)	36	6	0.42	+	14.33	0.0422
hindlimb morphogenesis (GO:0035137)	36	6	0.42	+	14.33	0.0422
mammary gland morphogenesis (GO:0060443)	42	7	0.49	+	14.33	0.00679
positive regulation of DNA binding (GO:0043388)	48	8	0.56	+	14.33	0.0011
positive regulation of protein localization to nucleus (GO:1900182)	132	22	1.54	+	14.33	9.38e-15
regulation of cardiac muscle tissue development (GO:0055024)	66	11	0.77	+	14.33	4.73e-06
epithelial to mesenchymal transition (GO:0001837)	67	11	0.78	+	14.11	5.53e-06
positive regulation of lyase activity (GO:0051349)	61	10	0.71	+	14.09	3.39e-05
regulation of nitric oxide biosynthetic process (GO:0045428)	55	9	0.64	+	14.06	0.000208
regulation of cholesterol transport (GO:0032374)	43	7	0.5	+	13.99	0.00793
regulation of sterol transport (GO:0032371)	43	7	0.5	+	13.99	0.00793
exocrine system development (GO:0035272)	43	7	0.5	+	13.99	0.00793
regulation of muscle hypertrophy (GO:0014743)	43	7	0.5	+	13.99	0.00793
neural crest cell migration (GO:0001755)	37	6	0.43	+	13.94	0.0493
negative regulation of epithelial cell apoptotic process (GO:1904036)	37	6	0.43	+	13.94	0.0493
branching morphogenesis of an epithelial tube (GO:0048754)	131	21	1.52	+	13.78	1.26e-13
positive regulation of epithelial cell migration (GO:0010634)	113	18	1.31	+	13.69	3.03e-11
regulation of glucose import (GO:0046324)	63	10	0.73	+	13.64	4.59e-05
formation of primary germ layer (GO:0001704)	114	18	1.33	+	13.57	3.51e-11
endochondral bone morphogenesis (GO:0060350)	51	8	0.59	+	13.48	0.00173
cellular response to ketone (GO:1901655)	83	13	0.97	+	13.46	2.68e-07
regulation of smooth muscle cell proliferation (GO:0048660)	115	18	1.34	+	13.45	4.07e-11
vasculogenesis (GO:0001570)	64	10	0.74	+	13.43	5.32e-05
cellular response to peptide hormone stimulus (GO:0071375)	256	40	2.98	+	13.43	2.8e-28
regulation of neural precursor cell proliferation (GO:2000177)	77	12	0.9	+	13.39	1.64e-06
intrinsic apoptotic signaling pathway by p53 class mediator (GO:0072332)	58	9	0.67	+	13.34	0.000326
regulation of stem cell proliferation (GO:0072091)	58	9	0.67	+	13.34	0.000326
regulation of epidermis development (GO:0045682)	71	11	0.83	+	13.32	1e-05
cellular response to retinoic acid (GO:0071300)	71	11	0.83	+	13.32	1e-05
gland morphogenesis (GO:0022612)	97	15	1.13	+	13.29	9.51e-09
stem cell proliferation (GO:0072089)	52	8	0.6	+	13.22	0.002
negative regulation of ERBB signaling pathway (GO:1901185)	52	8	0.6	+	13.22	0.002
positive regulation of neuron apoptotic process (GO:0043525)	52	8	0.6	+	13.22	0.002
regulation of morphogenesis of a branching structure (GO:0060688)	52	8	0.6	+	13.22	0.002
regulation of DNA biosynthetic process (GO:2000278)	105	16	1.22	+	13.1	2.06e-09
genitalia development (GO:0048806)	46	7	0.54	+	13.08	0.0123
visual learning (GO:0008542)	46	7	0.54	+	13.08	0.0123
cellular response to peptide (GO:1901653)	283	43	3.29	+	13.06	3.42e-30
regulation of transcription from RNA polymerase II promoter in response to hypoxia (GO:0061418)	79	12	0.92	+	13.06	2.19e-06
regulation of endothelial cell proliferation (GO:0001936)	99	15	1.15	+	13.02	1.27e-08
positive regulation of fibroblast proliferation (GO:0048146)	53	8	0.62	+	12.97	0.00231
morphogenesis of a branching epithelium (GO:0061138)	159	24	1.85	+	12.97	2.2e-15
negative regulation of Ras protein signal transduction (GO:0046580)	47	7	0.55	+	12.8	0.0142
Fc-epsilon receptor signaling pathway (GO:0038095)	175	26	2.04	+	12.77	9.76e-17
regulation of phospholipase activity (GO:0010517)	61	9	0.71	+	12.68	0.000498
activation of protein kinase activity (GO:0032147)	292	43	3.4	+	12.66	1.21e-29
neural crest cell differentiation (GO:0014033)	68	10	0.79	+	12.64	9.37e-05
odontogenesis (GO:0042476)	109	16	1.27	+	12.62	3.6e-09
mesoderm development (GO:0007498)	123	18	1.43	+	12.58	1.26e-10
stimulatory C-type lectin receptor signaling pathway (GO:0002223)	123	18	1.43	+	12.58	1.26e-10
face development (GO:0060324)	48	7	0.56	+	12.53	0.0163
peptidyl-tyrosine phosphorylation (GO:0018108)	192	28	2.23	+	12.53	4.86e-18
negative regulation of small GTPase mediated signal transduction (GO:0051058)	48	7	0.56	+	12.53	0.0163
negative regulation of myeloid leukocyte differentiation (GO:0002762)	48	7	0.56	+	12.53	0.0163
positive regulation of MAP kinase activity (GO:0043406)	255	37	2.97	+	12.47	8.83e-25
odontogenesis of dentin-containing tooth (GO:0042475)	76	11	0.88	+	12.44	2.02e-05
positive regulation of myeloid cell differentiation (GO:0045639)	83	12	0.97	+	12.43	3.8e-06
peptidyl-tyrosine modification (GO:0018212)	194	28	2.26	+	12.41	6.37e-18
innate immune response activating cell surface receptor signaling pathway (GO:0002220)	125	18	1.45	+	12.38	1.65e-10
mesenchymal cell differentiation (GO:0048762)	132	19	1.54	+	12.37	3.07e-11
protein autophosphorylation (GO:0046777)	195	28	2.27	+	12.34	7.28e-18
positive regulation of response to wounding (GO:1903036)	56	8	0.65	+	12.28	0.00348
positive regulation of wound healing (GO:0090303)	49	7	0.57	+	12.28	0.0187
signal transduction in response to DNA damage (GO:0042770)	98	14	1.14	+	12.28	1.53e-07
morphogenesis of a branching structure (GO:0001763)	168	24	1.95	+	12.28	7.54e-15
palate development (GO:0060021)	91	13	1.06	+	12.28	8.16e-07
positive regulation of STAT cascade (GO:1904894)	63	9	0.73	+	12.28	0.000653
mammary gland development (GO:0030879)	126	18	1.47	+	12.28	1.88e-10
negative regulation of angiogenesis (GO:0016525)	77	11	0.9	+	12.28	2.31e-05
regulation of cyclase activity (GO:0031279)	91	13	1.06	+	12.28	8.16e-07
insulin receptor signaling pathway (GO:0008286)	84	12	0.98	+	12.28	4.34e-06
positive regulation of JAK-STAT cascade (GO:0046427)	63	9	0.73	+	12.28	0.000653
response to ionizing radiation (GO:0010212)	148	21	1.72	+	12.2	1.38e-12
regulation of fibroblast proliferation (GO:0048145)	85	12	0.99	+	12.13	4.95e-06
positive regulation of muscle organ development (GO:0048636)	64	9	0.74	+	12.09	0.000745
positive regulation of striated muscle tissue development (GO:0045844)	64	9	0.74	+	12.09	0.000745
regulation of protein import (GO:1904589)	178	25	2.07	+	12.07	2.05e-15
positive regulation of osteoblast differentiation (GO:0045669)	57	8	0.66	+	12.06	0.00397
regulation of smooth muscle cell migration (GO:0014910)	57	8	0.66	+	12.06	0.00397
endoderm formation (GO:0001706)	50	7	0.58	+	12.03	0.0213
negative regulation of vasculature development (GO:1901343)	86	12	1	+	11.99	5.64e-06
regulation of organ growth (GO:0046620)	86	12	1	+	11.99	5.64e-06
negative regulation of blood vessel morphogenesis (GO:2000181)	79	11	0.92	+	11.97	3e-05
positive regulation of endothelial cell migration (GO:0010595)	72	10	0.84	+	11.94	0.000159
regulation of reactive oxygen species biosynthetic process (GO:1903426)	72	10	0.84	+	11.94	0.000159
positive regulation of muscle tissue development (GO:1901863)	65	9	0.76	+	11.9	0.000848
integrin-mediated signaling pathway (GO:0007229)	87	12	1.01	+	11.86	6.41e-06
negative regulation of neuron death (GO:1901215)	189	26	2.2	+	11.82	6.27e-16
Fc receptor signaling pathway (GO:0038093)	240	33	2.79	+	11.82	5.01e-21
JAK-STAT cascade (GO:0007259)	51	7	0.59	+	11.8	0.0242
STAT cascade (GO:0097696)	51	7	0.59	+	11.8	0.0242
regulation of histone acetylation (GO:0035065)	51	7	0.59	+	11.8	0.0242
positive regulation of phospholipase activity (GO:0010518)	51	7	0.59	+	11.8	0.0242
intrinsic apoptotic signaling pathway (GO:0097193)	153	21	1.78	+	11.8	2.63e-12
visual behavior (GO:0007632)	51	7	0.59	+	11.8	0.0242
regulation of protein import into nucleus (GO:0042306)	175	24	2.04	+	11.79	1.87e-14
activation of MAPK activity (GO:0000187)	146	20	1.7	+	11.77	1.42e-11
positive regulation of DNA metabolic process (GO:0051054)	212	29	2.47	+	11.76	4.84e-18
embryonic pattern specification (GO:0009880)	66	9	0.77	+	11.72	0.000963
metanephros development (GO:0001656)	81	11	0.94	+	11.67	3.87e-05
negative regulation of neuron apoptotic process (GO:0043524)	140	19	1.63	+	11.66	8.64e-11
cell cycle arrest (GO:0007050)	155	21	1.8	+	11.64	3.38e-12
regulation of neuron death (GO:1901214)	281	38	3.27	+	11.62	1.84e-24
endoderm development (GO:0007492)	74	10	0.86	+	11.61	0.000205
peptidyl-threonine phosphorylation (GO:0018107)	74	10	0.86	+	11.61	0.000205
regulation of epithelial to mesenchymal transition (GO:0010717)	74	10	0.86	+	11.61	0.000205
regulation of neuron apoptotic process (GO:0043523)	200	27	2.33	+	11.6	1.89e-16
digestive tract development (GO:0048565)	126	17	1.47	+	11.6	2.48e-09
regulation of smoothened signaling pathway (GO:0008589)	67	9	0.78	+	11.55	0.00109
peptidyl-serine phosphorylation (GO:0018105)	164	22	1.91	+	11.53	8.03e-13
regulation of DNA-templated transcription in response to stress (GO:0043620)	120	16	1.4	+	11.46	1.5e-08
multicellular organism growth (GO:0035264)	83	11	0.97	+	11.39	4.95e-05
positive regulation of carbohydrate metabolic process (GO:0045913)	68	9	0.79	+	11.38	0.00123
homotypic cell-cell adhesion (GO:0034109)	53	7	0.62	+	11.35	0.0311
regulation of reactive oxygen species metabolic process (GO:2000377)	159	21	1.85	+	11.35	5.54e-12
digestive system development (GO:0055123)	137	18	1.59	+	11.29	7.59e-10
regulation of telomere maintenance via telomere lengthening (GO:1904356)	61	8	0.71	+	11.27	0.00657
positive regulation of protein kinase activity (GO:0045860)	481	63	5.6	+	11.26	1.37e-42
fibroblast growth factor receptor signaling pathway (GO:0008543)	84	11	0.98	+	11.26	5.59e-05
cellular response to organonitrogen compound (GO:0071417)	482	63	5.61	+	11.23	1.55e-42
phosphatidylinositol biosynthetic process (GO:0006661)	138	18	1.61	+	11.21	8.56e-10
regulation of cell cycle arrest (GO:0071156)	115	15	1.34	+	11.21	1.02e-07
regulation of transcription from RNA polymerase II promoter in response to stress (GO:0043618)	115	15	1.34	+	11.21	1.02e-07
signal transduction by protein phosphorylation (GO:0023014)	415	54	4.83	+	11.18	1.31e-35
regulation of protein localization to nucleus (GO:1900180)	223	29	2.59	+	11.18	1.88e-17
regulation of adenylate cyclase activity (GO:0045761)	77	10	0.9	+	11.16	0.000296
regulation of osteoblast differentiation (GO:0045667)	108	14	1.26	+	11.14	5.39e-07
regulation of telomere maintenance via telomerase (GO:0032210)	54	7	0.63	+	11.14	0.0351
ureteric bud development (GO:0001657)	85	11	0.99	+	11.12	6.31e-05
positive regulation of kinase activity (GO:0033674)	519	67	6.04	+	11.1	2.76e-45
ventricular septum development (GO:0003281)	62	8	0.72	+	11.09	0.00741
positive regulation of protein serine/threonine kinase activity (GO:0071902)	334	43	3.89	+	11.07	2.62e-27
B cell activation (GO:0042113)	140	18	1.63	+	11.05	1.09e-09
cell fate commitment (GO:0045165)	226	29	2.63	+	11.03	2.69e-17
peptidyl-threonine modification (GO:0018210)	78	10	0.91	+	11.02	0.000334
somite development (GO:0061053)	78	10	0.91	+	11.02	0.000334
cardiac chamber morphogenesis (GO:0003206)	117	15	1.36	+	11.02	1.29e-07
positive regulation of epithelial cell proliferation (GO:0050679)	164	21	1.91	+	11.01	1.01e-11
mesonephric tubule development (GO:0072164)	86	11	1	+	10.99	7.1e-05
mesonephric epithelium development (GO:0072163)	86	11	1	+	10.99	7.1e-05
DNA damage response, signal transduction by p53 class mediator (GO:0030330)	86	11	1	+	10.99	7.1e-05
cardiac septum development (GO:0003279)	94	12	1.09	+	10.97	1.51e-05
glial cell differentiation (GO:0010001)	149	19	1.73	+	10.96	2.58e-10
cellular response to radiation (GO:0071478)	149	19	1.73	+	10.96	2.58e-10
regulation of peptidyl-lysine acetylation (GO:2000756)	55	7	0.64	+	10.94	0.0395
regulation of monooxygenase activity (GO:0032768)	55	7	0.64	+	10.94	0.0395
peptidyl-serine modification (GO:0018209)	181	23	2.11	+	10.92	4.95e-13
immune response-regulating cell surface receptor signaling pathway involved in phagocytosis (GO:0002433)	126	16	1.47	+	10.91	3.08e-08
maternal process involved in female pregnancy (GO:0060135)	63	8	0.73	+	10.91	0.00834
Fc-gamma receptor signaling pathway involved in phagocytosis (GO:0038096)	126	16	1.47	+	10.91	3.08e-08
regulation of nucleocytoplasmic transport (GO:0046822)	63	8	0.73	+	10.91	0.00834
regulation of cartilage development (GO:0061035)	63	8	0.73	+	10.91	0.00834
angiogenesis (GO:0001525)	292	37	3.4	+	10.89	9.27e-23
gastrulation (GO:0007369)	158	20	1.84	+	10.88	6.09e-11
regulation of gliogenesis (GO:0014013)	95	12	1.11	+	10.86	1.7e-05
regulation of MAP kinase activity (GO:0043405)	326	41	3.79	+	10.81	1.77e-25
artery morphogenesis (GO:0048844)	56	7	0.65	+	10.74	0.0443
regulation of lipid catabolic process (GO:0050994)	56	7	0.65	+	10.74	0.0443
positive regulation of small GTPase mediated signal transduction (GO:0051057)	56	7	0.65	+	10.74	0.0443
cellular response to UV (GO:0034644)	72	9	0.84	+	10.74	0.00198
DNA damage response, signal transduction by p53 class mediator resulting in cell cycle arrest (GO:0006977)	64	8	0.74	+	10.74	0.00936
Fc receptor mediated stimulatory signaling pathway (GO:0002431)	128	16	1.49	+	10.74	3.88e-08
mesenchymal cell development (GO:0014031)	64	8	0.74	+	10.74	0.00936
axis specification (GO:0009798)	88	11	1.02	+	10.74	8.96e-05
T cell costimulation (GO:0031295)	80	10	0.93	+	10.74	0.000421
B cell differentiation (GO:0030183)	96	12	1.12	+	10.74	1.91e-05
phosphatidylinositol metabolic process (GO:0046488)	216	27	2.51	+	10.74	1.29e-15
regulation of epidermal growth factor receptor signaling pathway (GO:0042058)	80	10	0.93	+	10.74	0.000421
forebrain generation of neurons (GO:0021872)	64	8	0.74	+	10.74	0.00936
MAPK cascade (GO:0000165)	369	46	4.29	+	10.71	6.84e-29
carbohydrate homeostasis (GO:0033500)	177	22	2.06	+	10.68	3.77e-12
glucose homeostasis (GO:0042593)	177	22	2.06	+	10.68	3.77e-12
steroid hormone mediated signaling pathway (GO:0043401)	129	16	1.5	+	10.66	4.35e-08
regulation of embryonic development (GO:0045995)	121	15	1.41	+	10.66	2.05e-07
regulation of myeloid leukocyte differentiation (GO:0002761)	113	14	1.31	+	10.65	9.66e-07
mesenchyme development (GO:0060485)	194	24	2.26	+	10.63	1.83e-13
regulation of cell-matrix adhesion (GO:0001952)	97	12	1.13	+	10.63	2.14e-05
cellular response to nitrogen compound (GO:1901699)	558	69	6.49	+	10.63	1.26e-45
positive regulation of protein binding (GO:0032092)	81	10	0.94	+	10.61	0.000472
renal tubule development (GO:0061326)	81	10	0.94	+	10.61	0.000472
I-kappaB kinase/NF-kappaB signaling (GO:0007249)	73	9	0.85	+	10.6	0.00222
signal transduction involved in mitotic G1 DNA damage checkpoint (GO:0072431)	65	8	0.76	+	10.58	0.0105
signal transduction involved in mitotic cell cycle checkpoint (GO:0072413)	65	8	0.76	+	10.58	0.0105
signal transduction involved in mitotic DNA integrity checkpoint (GO:1902403)	65	8	0.76	+	10.58	0.0105
signal transduction involved in mitotic DNA damage checkpoint (GO:1902402)	65	8	0.76	+	10.58	0.0105
intracellular signal transduction involved in G1 DNA damage checkpoint (GO:1902400)	65	8	0.76	+	10.58	0.0105
Fc-gamma receptor signaling pathway (GO:0038094)	130	16	1.51	+	10.58	4.87e-08
blood vessel morphogenesis (GO:0048514)	374	46	4.35	+	10.57	1.21e-28
endothelial cell migration (GO:0043542)	57	7	0.66	+	10.56	0.0497
mesonephros development (GO:0001823)	90	11	1.05	+	10.51	0.000112
positive regulation of cell cycle arrest (GO:0071158)	90	11	1.05	+	10.51	0.000112
positive regulation of lipid metabolic process (GO:0045834)	131	16	1.52	+	10.5	5.45e-08
response to peptide hormone (GO:0043434)	369	45	4.29	+	10.48	8.85e-28
regulation of plasma membrane organization (GO:1903729)	82	10	0.95	+	10.48	0.000529
respiratory system development (GO:0060541)	197	24	2.29	+	10.47	2.57e-13
mitotic G1/S transition checkpoint (GO:0044819)	74	9	0.86	+	10.45	0.00249
regulation of cell junction assembly (GO:1901888)	74	9	0.86	+	10.45	0.00249
mitotic G1 DNA damage checkpoint (GO:0031571)	74	9	0.86	+	10.45	0.00249
response to ketone (GO:1901654)	181	22	2.11	+	10.45	5.92e-12
regulation of epithelial cell apoptotic process (GO:1904035)	66	8	0.77	+	10.42	0.0117
positive regulation of ossification (GO:0045778)	83	10	0.97	+	10.36	0.000591
lymphocyte costimulation (GO:0031294)	83	10	0.97	+	10.36	0.000591
response to retinoic acid (GO:0032526)	108	13	1.26	+	10.35	6.36e-06
non-canonical Wnt signaling pathway (GO:0035567)	133	16	1.55	+	10.34	6.8e-08
response to oxygen levels (GO:0070482)	358	43	4.17	+	10.32	4.12e-26
G1 DNA damage checkpoint (GO:0044783)	75	9	0.87	+	10.31	0.00278
regulation of lipid transport (GO:0032368)	100	12	1.16	+	10.31	2.99e-05
intracellular receptor signaling pathway (GO:0030522)	175	21	2.04	+	10.31	3.53e-11
ameboidal-type cell migration (GO:0001667)	142	17	1.65	+	10.29	1.61e-08
positive regulation of chromatin organization (GO:1905269)	92	11	1.07	+	10.28	0.00014
signal transduction involved in DNA damage checkpoint (GO:0072422)	67	8	0.78	+	10.26	0.0131
signal transduction involved in DNA integrity checkpoint (GO:0072401)	67	8	0.78	+	10.26	0.0131
cellular response to insulin stimulus (GO:0032869)	151	18	1.76	+	10.25	3.79e-09
response to peptide (GO:1901652)	420	50	4.89	+	10.23	7.61e-31
blood coagulation (GO:0007596)	294	35	3.42	+	10.23	1.78e-20
positive regulation of protein kinase B signaling (GO:0051897)	84	10	0.98	+	10.23	0.000659
negative regulation of cysteine-type endopeptidase activity involved in apoptotic process (GO:0043154)	84	10	0.98	+	10.23	0.000659
Ras protein signal transduction (GO:0007265)	152	18	1.77	+	10.18	4.22e-09
epithelial cell migration (GO:0010631)	76	9	0.88	+	10.18	0.0031
regulation of lyase activity (GO:0051339)	93	11	1.08	+	10.17	0.000156
coagulation (GO:0050817)	296	35	3.44	+	10.16	2.22e-20
transmembrane receptor protein tyrosine kinase signaling pathway (GO:0007169)	517	61	6.02	+	10.14	1.74e-38
regulation of epithelial cell migration (GO:0010632)	178	21	2.07	+	10.14	4.89e-11
signal transduction involved in cell cycle checkpoint (GO:0072395)	68	8	0.79	+	10.11	0.0146
regulation of muscle adaptation (GO:0043502)	68	8	0.79	+	10.11	0.0146
T cell receptor signaling pathway (GO:0050852)	153	18	1.78	+	10.11	4.7e-09
positive regulation of binding (GO:0051099)	153	18	1.78	+	10.11	4.7e-09
regulation of carbohydrate biosynthetic process (GO:0043255)	85	10	0.99	+	10.11	0.000735
hemostasis (GO:0007599)	299	35	3.48	+	10.06	3.06e-20
transforming growth factor beta receptor signaling pathway (GO:0007179)	94	11	1.09	+	10.06	0.000174
lung development (GO:0030324)	171	20	1.99	+	10.05	2.59e-10
gland development (GO:0048732)	402	47	4.68	+	10.05	2.12e-28
cellular response to mechanical stimulus (GO:0071260)	77	9	0.9	+	10.05	0.00345
animal organ regeneration (GO:0031100)	77	9	0.9	+	10.05	0.00345
response to fibroblast growth factor (GO:0071774)	120	14	1.4	+	10.03	2.09e-06
regulation of striated muscle tissue development (GO:0016202)	120	14	1.4	+	10.03	2.09e-06
cellular response to reactive oxygen species (GO:0034614)	120	14	1.4	+	10.03	2.09e-06
regulation of glucose transport (GO:0010827)	103	12	1.2	+	10.01	4.13e-05
cellular response to acid chemical (GO:0071229)	198	23	2.3	+	9.98	3.28e-12
columnar/cuboidal epithelial cell differentiation (GO:0002065)	95	11	1.11	+	9.95	0.000194
placenta development (GO:0001890)	147	17	1.71	+	9.94	2.75e-08
cellular response to oxygen levels (GO:0071453)	199	23	2.32	+	9.93	3.65e-12
ovulation cycle process (GO:0022602)	78	9	0.91	+	9.92	0.00384
ephrin receptor signaling pathway (GO:0048013)	87	10	1.01	+	9.88	0.000908
regulation of muscle tissue development (GO:1901861)	122	14	1.42	+	9.86	2.58e-06
response to UV (GO:0009411)	131	15	1.52	+	9.84	6.09e-07
cell fate specification (GO:0001708)	70	8	0.81	+	9.82	0.0181
regulation of intracellular steroid hormone receptor signaling pathway (GO:0033143)	70	8	0.81	+	9.82	0.0181
respiratory tube development (GO:0030323)	175	20	2.04	+	9.82	3.95e-10
neural precursor cell proliferation (GO:0061351)	70	8	0.81	+	9.82	0.0181
cardiocyte differentiation (GO:0035051)	105	12	1.22	+	9.82	5.1e-05
cellular response to hormone stimulus (GO:0032870)	543	62	6.32	+	9.81	2.17e-38
response to decreased oxygen levels (GO:0036293)	342	39	3.98	+	9.8	1.55e-22
epithelium migration (GO:0090132)	79	9	0.92	+	9.79	0.00426
response to hypoxia (GO:0001666)	334	38	3.89	+	9.78	7.82e-22
apoptotic signaling pathway (GO:0097190)	291	33	3.39	+	9.75	1.75e-18
renal system process (GO:0003014)	106	12	1.23	+	9.73	5.65e-05
interferon-gamma-mediated signaling pathway (GO:0060333)	71	8	0.83	+	9.68	0.02
energy reserve metabolic process (GO:0006112)	71	8	0.83	+	9.68	0.02
associative learning (GO:0008306)	71	8	0.83	+	9.68	0.02
positive regulation of transferase activity (GO:0051347)	657	74	7.64	+	9.68	1.2e-46
positive regulation of cAMP biosynthetic process (GO:0030819)	80	9	0.93	+	9.67	0.00473
lipid modification (GO:0030258)	240	27	2.79	+	9.67	1.74e-14
regulation of myeloid cell differentiation (GO:0045637)	178	20	2.07	+	9.66	5.38e-10
negative regulation of cysteine-type endopeptidase activity (GO:2000117)	89	10	1.04	+	9.66	0.00112
regulation of generation of precursor metabolites and energy (GO:0043467)	89	10	1.04	+	9.66	0.00112
regulation of muscle organ development (GO:0048634)	125	14	1.45	+	9.63	3.51e-06
cellular response to transforming growth factor beta stimulus (GO:0071560)	143	16	1.66	+	9.62	1.96e-07
positive regulation of vasculature development (GO:1904018)	143	16	1.66	+	9.62	1.96e-07
regulation of morphogenesis of an epithelium (GO:1905330)	179	20	2.08	+	9.6	5.96e-10
regulation of organ morphogenesis (GO:2000027)	251	28	2.92	+	9.59	4.88e-15
positive regulation of angiogenesis (GO:0045766)	126	14	1.47	+	9.55	3.88e-06
blood vessel development (GO:0001568)	459	51	5.34	+	9.55	3.82e-30
regulation of multicellular organism growth (GO:0040014)	72	8	0.84	+	9.55	0.0222
cellular response to decreased oxygen levels (GO:0036294)	189	21	2.2	+	9.55	1.54e-10
epithelial tube morphogenesis (GO:0060562)	298	33	3.47	+	9.52	3.58e-18
tube morphogenesis (GO:0035239)	335	37	3.9	+	9.49	9.84e-21
regulation of DNA replication (GO:0006275)	118	13	1.37	+	9.47	1.81e-05
fat cell differentiation (GO:0045444)	109	12	1.27	+	9.46	7.67e-05
entry into other organism involved in symbiotic interaction (GO:0051828)	100	11	1.16	+	9.45	0.000324
entry into cell of other organism involved in symbiotic interaction (GO:0051806)	100	11	1.16	+	9.45	0.000324
negative regulation of G1/S transition of mitotic cell cycle (GO:2000134)	100	11	1.16	+	9.45	0.000324
entry into host (GO:0044409)	100	11	1.16	+	9.45	0.000324
entry into host cell (GO:0030260)	100	11	1.16	+	9.45	0.000324
cellular response to hypoxia (GO:0071456)	182	20	2.12	+	9.45	8.06e-10
positive regulation of Wnt signaling pathway (GO:0030177)	155	17	1.8	+	9.43	6.24e-08
regulation of protein localization to plasma membrane (GO:1903076)	73	8	0.85	+	9.42	0.0245
endothelial cell differentiation (GO:0045446)	73	8	0.85	+	9.42	0.0245
mitotic cell cycle checkpoint (GO:0007093)	146	16	1.7	+	9.42	2.65e-07
response to transforming growth factor beta (GO:0071559)	146	16	1.7	+	9.42	2.65e-07
regulation of protein serine/threonine kinase activity (GO:0071900)	475	52	5.53	+	9.41	1.62e-30
kidney epithelium development (GO:0072073)	128	14	1.49	+	9.4	4.74e-06
regulation of ossification (GO:0030278)	183	20	2.13	+	9.39	8.9e-10
regulation of endothelial cell migration (GO:0010594)	119	13	1.38	+	9.39	2e-05
regulation of DNA binding (GO:0051101)	110	12	1.28	+	9.38	8.47e-05
mitotic DNA damage checkpoint (GO:0044773)	101	11	1.18	+	9.36	0.000358
regulation of G1/S transition of mitotic cell cycle (GO:2000045)	147	16	1.71	+	9.36	2.92e-07
cellular response to organic cyclic compound (GO:0071407)	488	53	5.68	+	9.33	5.06e-31
regulation of angiogenesis (GO:0045765)	221	24	2.57	+	9.33	3.18e-12
axon guidance (GO:0007411)	221	24	2.57	+	9.33	3.18e-12
cellular glucose homeostasis (GO:0001678)	83	9	0.97	+	9.32	0.00639
regulation of hemostasis (GO:1900046)	83	9	0.97	+	9.32	0.00639
regulation of blood coagulation (GO:0030193)	83	9	0.97	+	9.32	0.00639
gliogenesis (GO:0042063)	194	21	2.26	+	9.3	2.53e-10
developmental growth involved in morphogenesis (GO:0060560)	111	12	1.29	+	9.29	9.34e-05
positive regulation of ERK1 and ERK2 cascade (GO:0070374)	185	20	2.15	+	9.29	1.08e-09
ovulation cycle (GO:0042698)	102	11	1.19	+	9.27	0.000394
cellular response to starvation (GO:0009267)	130	14	1.51	+	9.26	5.77e-06
neuron projection guidance (GO:0097485)	223	24	2.59	+	9.25	3.87e-12
myeloid leukocyte differentiation (GO:0002573)	93	10	1.08	+	9.24	0.00167
regulation of ERBB signaling pathway (GO:1901184)	93	10	1.08	+	9.24	0.00167
response to insulin (GO:0032868)	214	23	2.49	+	9.24	1.67e-11
positive regulation of canonical Wnt signaling pathway (GO:0090263)	121	13	1.41	+	9.23	2.44e-05
heart morphogenesis (GO:0003007)	224	24	2.61	+	9.21	4.26e-12
positive regulation of peptidyl-tyrosine phosphorylation (GO:0050731)	159	17	1.85	+	9.19	9.23e-08
response to alcohol (GO:0097305)	197	21	2.29	+	9.16	3.39e-10
protein import into nucleus (GO:0006606)	122	13	1.42	+	9.16	2.69e-05
nephron development (GO:0072006)	122	13	1.42	+	9.16	2.69e-05
protein targeting to nucleus (GO:0044744)	122	13	1.42	+	9.16	2.69e-05
cellular response to light stimulus (GO:0071482)	94	10	1.09	+	9.14	0.00184
cellular response to fibroblast growth factor stimulus (GO:0044344)	113	12	1.31	+	9.13	0.000113
regulation of vasculature development (GO:1901342)	245	26	2.85	+	9.12	3.04e-13
vasculature development (GO:0001944)	481	51	5.6	+	9.11	3.4e-29
positive regulation of MAPK cascade (GO:0043410)	481	51	5.6	+	9.11	3.4e-29
regulation of peptidyl-tyrosine phosphorylation (GO:0050730)	217	23	2.52	+	9.11	2.23e-11
cardiovascular system development (GO:0072358)	491	52	5.71	+	9.1	7.86e-30
dorsal/ventral pattern formation (GO:0009953)	85	9	0.99	+	9.1	0.00776
positive regulation of histone modification (GO:0031058)	85	9	0.99	+	9.1	0.00776
regulation of epithelial cell proliferation (GO:0050678)	293	31	3.41	+	9.09	2.52e-16
negative regulation of cell cycle G1/S phase transition (GO:1902807)	104	11	1.21	+	9.09	0.000479
primary neural tube formation (GO:0014020)	95	10	1.11	+	9.05	0.00202
positive regulation of mitotic cell cycle (GO:0045931)	133	14	1.55	+	9.05	7.71e-06
cellular response to oxygen-containing compound (GO:1901701)	874	92	10.17	+	9.05	1.3e-57
wound healing (GO:0042060)	466	49	5.42	+	9.04	1.02e-27
negative regulation of protein serine/threonine kinase activity (GO:0071901)	124	13	1.44	+	9.01	3.25e-05
negative regulation of extrinsic apoptotic signaling pathway (GO:2001237)	105	11	1.22	+	9	0.000526
positive regulation of purine nucleotide biosynthetic process (GO:1900373)	105	11	1.22	+	9	0.000526
positive regulation of nucleotide biosynthetic process (GO:0030810)	105	11	1.22	+	9	0.000526
glial cell development (GO:0021782)	86	9	1	+	8.99	0.00853
tissue migration (GO:0090130)	86	9	1	+	8.99	0.00853
negative regulation of myeloid cell differentiation (GO:0045638)	77	8	0.9	+	8.93	0.0361
nephron tubule development (GO:0072080)	77	8	0.9	+	8.93	0.0361
intracellular steroid hormone receptor signaling pathway (GO:0030518)	77	8	0.9	+	8.93	0.0361
artery development (GO:0060840)	77	8	0.9	+	8.93	0.0361
regulation of cell-substrate adhesion (GO:0010810)	183	19	2.13	+	8.92	9.04e-09
DNA damage checkpoint (GO:0000077)	145	15	1.69	+	8.89	2.42e-06
embryonic placenta development (GO:0001892)	87	9	1.01	+	8.89	0.00937
negative regulation of epithelial cell proliferation (GO:0050680)	116	12	1.35	+	8.89	0.000151
female gonad development (GO:0008585)	87	9	1.01	+	8.89	0.00937
endothelium development (GO:0003158)	87	9	1.01	+	8.89	0.00937
negative regulation of DNA metabolic process (GO:0051053)	126	13	1.47	+	8.87	3.92e-05
response to growth factor (GO:0070848)	495	51	5.76	+	8.86	1.29e-28
stem cell differentiation (GO:0048863)	136	14	1.58	+	8.85	1.02e-05
negative regulation of canonical Wnt signaling pathway (GO:0090090)	166	17	1.93	+	8.8	1.79e-07
neural tube closure (GO:0001843)	88	9	1.02	+	8.79	0.0103
regulation of lipase activity (GO:0060191)	88	9	1.02	+	8.79	0.0103
regulation of coagulation (GO:0050818)	88	9	1.02	+	8.79	0.0103
midbrain development (GO:0030901)	88	9	1.02	+	8.79	0.0103
positive regulation of cAMP metabolic process (GO:0030816)	88	9	1.02	+	8.79	0.0103
enzyme linked receptor protein signaling pathway (GO:0007167)	714	73	8.31	+	8.79	4.34e-43
response to cAMP (GO:0051591)	98	10	1.14	+	8.77	0.00267
positive regulation of cyclic nucleotide biosynthetic process (GO:0030804)	98	10	1.14	+	8.77	0.00267
response to monosaccharide (GO:0034284)	147	15	1.71	+	8.77	2.91e-06
regulation of carbohydrate metabolic process (GO:0006109)	157	16	1.83	+	8.76	7.56e-07
neural tube development (GO:0021915)	157	16	1.83	+	8.76	7.56e-07
mitotic DNA integrity checkpoint (GO:0044774)	108	11	1.26	+	8.75	0.000696
positive regulation of protein phosphorylation (GO:0001934)	886	90	10.31	+	8.73	7.65e-55
tumor necrosis factor-mediated signaling pathway (GO:0033209)	128	13	1.49	+	8.73	4.72e-05
cellular response to abiotic stimulus (GO:0071214)	276	28	3.21	+	8.72	5.42e-14
regulation of telomere maintenance (GO:0032204)	79	8	0.92	+	8.7	0.0435
positive regulation of sequence-specific DNA binding transcription factor activity (GO:0051091)	237	24	2.76	+	8.7	1.45e-11
regulation of protein localization to cell periphery (GO:1904375)	79	8	0.92	+	8.7	0.0435
hormone-mediated signaling pathway (GO:0009755)	168	17	1.95	+	8.7	2.15e-07
positive regulation of phosphorylation (GO:0042327)	929	94	10.81	+	8.7	1.33e-57
tube closure (GO:0060606)	89	9	1.04	+	8.69	0.0113
cellular response to lipid (GO:0071396)	476	48	5.54	+	8.67	2.83e-26
regulation of wound healing (GO:0061041)	129	13	1.5	+	8.66	5.17e-05
positive regulation of cell migration (GO:0030335)	407	41	4.74	+	8.66	7.27e-22
regulation of extrinsic apoptotic signaling pathway (GO:2001236)	159	16	1.85	+	8.65	9.07e-07
connective tissue development (GO:0061448)	199	20	2.32	+	8.64	4.04e-09
cellular response to growth factor stimulus (GO:0071363)	468	47	5.44	+	8.63	1.45e-25
response to hormone (GO:0009725)	777	78	9.04	+	8.63	5.6e-46
lymphocyte activation involved in immune response (GO:0002285)	100	10	1.16	+	8.6	0.00321
bone morphogenesis (GO:0060349)	90	9	1.05	+	8.6	0.0123
cardiac muscle cell differentiation (GO:0055007)	80	8	0.93	+	8.6	0.0476
regulation of canonical Wnt signaling pathway (GO:0060828)	240	24	2.79	+	8.6	1.9e-11
regulation of cell cycle G1/S phase transition (GO:1902806)	160	16	1.86	+	8.6	9.92e-07
leukocyte differentiation (GO:0002521)	301	30	3.5	+	8.57	5.37e-15
lymphocyte differentiation (GO:0030098)	221	22	2.57	+	8.56	3.18e-10
response to mechanical stimulus (GO:0009612)	211	21	2.45	+	8.55	1.24e-09
cellular response to steroid hormone stimulus (GO:0071383)	191	19	2.22	+	8.55	1.88e-08
limb development (GO:0060173)	171	17	1.99	+	8.54	2.81e-07
appendage development (GO:0048736)	171	17	1.99	+	8.54	2.81e-07
response to hexose (GO:0009746)	141	14	1.64	+	8.53	1.61e-05
stress-activated protein kinase signaling cascade (GO:0031098)	111	11	1.29	+	8.52	0.000913
positive regulation of protein ubiquitination involved in ubiquitin-dependent protein catabolic process (GO:2000060)	91	9	1.06	+	8.5	0.0135
development of primary female sexual characteristics (GO:0046545)	91	9	1.06	+	8.5	0.0135
extrinsic apoptotic signaling pathway (GO:0097191)	91	9	1.06	+	8.5	0.0135
regulation of DNA metabolic process (GO:0051052)	385	38	4.48	+	8.48	1.05e-19
signal transduction by p53 class mediator (GO:0072331)	132	13	1.54	+	8.46	6.76e-05
female gamete generation (GO:0007292)	122	12	1.42	+	8.45	0.00026
endocrine system development (GO:0035270)	122	12	1.42	+	8.45	0.00026
activation of innate immune response (GO:0002218)	234	23	2.72	+	8.45	1.06e-10
positive regulation of muscle cell differentiation (GO:0051149)	92	9	1.07	+	8.41	0.0147
morphogenesis of an epithelium (GO:0002009)	409	40	4.76	+	8.41	8.84e-21
cellular response to nutrient levels (GO:0031669)	174	17	2.02	+	8.4	3.66e-07
regulation of kinase activity (GO:0043549)	810	79	9.42	+	8.38	9.27e-46
cardiac chamber development (GO:0003205)	154	15	1.79	+	8.37	5.45e-06
regulation of protein kinase activity (GO:0045859)	750	73	8.73	+	8.37	1.17e-41
rhythmic process (GO:0048511)	288	28	3.35	+	8.36	1.58e-13
neural tube formation (GO:0001841)	103	10	1.2	+	8.34	0.00418
renal system development (GO:0072001)	268	26	3.12	+	8.34	2.48e-12
cell-substrate adhesion (GO:0031589)	165	16	1.92	+	8.33	1.54e-06
positive regulation of cell motility (GO:2000147)	423	41	4.92	+	8.33	3.03e-21
innate immune response-activating signal transduction (GO:0002758)	227	22	2.64	+	8.33	5.4e-10
DNA integrity checkpoint (GO:0031570)	155	15	1.8	+	8.32	5.94e-06
segmentation (GO:0035282)	93	9	1.08	+	8.32	0.0161
tube formation (GO:0035148)	145	14	1.69	+	8.3	2.28e-05
negative regulation of Wnt signaling pathway (GO:0030178)	197	19	2.29	+	8.29	3.18e-08
response to starvation (GO:0042594)	166	16	1.93	+	8.28	1.68e-06
reproductive structure development (GO:0048608)	415	40	4.83	+	8.28	1.49e-20
positive regulation of purine nucleotide metabolic process (GO:1900544)	135	13	1.57	+	8.28	8.78e-05
positive regulation of nucleotide metabolic process (GO:0045981)	135	13	1.57	+	8.28	8.78e-05
liver development (GO:0001889)	125	12	1.45	+	8.25	0.000337
regulation of epithelial cell differentiation (GO:0030856)	125	12	1.45	+	8.25	0.000337
limb morphogenesis (GO:0035108)	146	14	1.7	+	8.24	2.49e-05
appendage morphogenesis (GO:0035107)	146	14	1.7	+	8.24	2.49e-05
negative regulation of programmed cell death (GO:0043069)	845	81	9.83	+	8.24	1.45e-46
regulation of Wnt signaling pathway (GO:0030111)	313	30	3.64	+	8.24	1.54e-14
urogenital system development (GO:0001655)	303	29	3.53	+	8.23	6.13e-14
kidney development (GO:0001822)	251	24	2.92	+	8.22	4.98e-11
reproductive system development (GO:0061458)	419	40	4.87	+	8.21	2.11e-20
aging (GO:0007568)	262	25	3.05	+	8.2	1.38e-11
immune response-regulating cell surface receptor signaling pathway (GO:0002768)	430	41	5	+	8.2	5.55e-21
tissue morphogenesis (GO:0048729)	514	49	5.98	+	8.19	7.93e-26
regulation of protein kinase B signaling (GO:0051896)	126	12	1.47	+	8.19	0.000367
stress-activated MAPK cascade (GO:0051403)	105	10	1.22	+	8.19	0.00497
embryonic limb morphogenesis (GO:0030326)	126	12	1.47	+	8.19	0.000367
embryonic appendage morphogenesis (GO:0035113)	126	12	1.47	+	8.19	0.000367
cellular response to endogenous stimulus (GO:0071495)	1053	100	12.25	+	8.16	1.8e-59
negative regulation of apoptotic process (GO:0043066)	832	79	9.68	+	8.16	6.45e-45
regulation of ERK1 and ERK2 cascade (GO:0070372)	253	24	2.94	+	8.15	5.9e-11
extracellular matrix organization (GO:0030198)	306	29	3.56	+	8.15	7.92e-14
regulation of body fluid levels (GO:0050878)	496	47	5.77	+	8.14	1.71e-24
positive regulation of cell cycle (GO:0045787)	359	34	4.18	+	8.14	9.84e-17
response to carbohydrate (GO:0009743)	169	16	1.97	+	8.14	2.17e-06
cellular response to external stimulus (GO:0071496)	275	26	3.2	+	8.13	4.52e-12
response to acid chemical (GO:0001101)	328	31	3.82	+	8.12	5.89e-15
extracellular structure organization (GO:0043062)	307	29	3.57	+	8.12	8.62e-14
negative regulation of growth (GO:0045926)	233	22	2.71	+	8.12	9.02e-10
positive regulation of intracellular protein transport (GO:0090316)	265	25	3.08	+	8.11	1.78e-11
positive regulation of cellular component movement (GO:0051272)	435	41	5.06	+	8.1	8.5e-21
cell cycle checkpoint (GO:0000075)	202	19	2.35	+	8.08	4.86e-08
regulation of purine nucleotide biosynthetic process (GO:1900371)	149	14	1.73	+	8.08	3.21e-05
regeneration (GO:0031099)	149	14	1.73	+	8.08	3.21e-05
response to wounding (GO:0009611)	554	52	6.45	+	8.07	2.34e-27
positive regulation of phosphorus metabolic process (GO:0010562)	1055	99	12.27	+	8.07	2.79e-58
positive regulation of phosphate metabolic process (GO:0045937)	1055	99	12.27	+	8.07	2.79e-58
camera-type eye development (GO:0043010)	288	27	3.35	+	8.06	1.47e-12
regulation of lipid localization (GO:1905952)	128	12	1.49	+	8.06	0.000434
hepaticobiliary system development (GO:0061008)	128	12	1.49	+	8.06	0.000434
regulation of protein ubiquitination involved in ubiquitin-dependent protein catabolic process (GO:2000058)	107	10	1.24	+	8.03	0.00588
response to hydrogen peroxide (GO:0042542)	107	10	1.24	+	8.03	0.00588
circulatory system development (GO:0072359)	803	75	9.34	+	8.03	9.07e-42
regulation of nucleotide biosynthetic process (GO:0030808)	150	14	1.75	+	8.02	3.49e-05
transmembrane receptor protein serine/threonine kinase signaling pathway (GO:0007178)	193	18	2.25	+	8.02	2.04e-07
protein phosphorylation (GO:0006468)	970	90	11.29	+	7.97	1.4e-51
nephron epithelium development (GO:0072009)	97	9	1.13	+	7.97	0.0226
cartilage development (GO:0051216)	151	14	1.76	+	7.97	3.79e-05
negative regulation of cell death (GO:0060548)	917	85	10.67	+	7.97	3.72e-48
tube development (GO:0035295)	561	52	6.53	+	7.97	4.22e-27
positive regulation of cyclic nucleotide metabolic process (GO:0030801)	108	10	1.26	+	7.96	0.00639
protein localization to nucleus (GO:0034504)	173	16	2.01	+	7.95	3.03e-06
regulation of binding (GO:0051098)	325	30	3.78	+	7.93	4.22e-14
regulation of response to wounding (GO:1903034)	152	14	1.77	+	7.92	4.12e-05
negative regulation of cell growth (GO:0030308)	163	15	1.9	+	7.91	1.16e-05
negative regulation of mitotic cell cycle (GO:0045930)	272	25	3.16	+	7.9	3.18e-11
positive regulation of protein localization to membrane (GO:1905477)	109	10	1.27	+	7.89	0.00693
positive regulation of cell proliferation (GO:0008284)	851	78	9.9	+	7.88	3.71e-43
epithelial tube formation (GO:0072175)	131	12	1.52	+	7.87	0.000556
transcription initiation from RNA polymerase II promoter (GO:0006367)	153	14	1.78	+	7.86	4.46e-05
cardiac muscle tissue development (GO:0048738)	153	14	1.78	+	7.86	4.46e-05
regulation of protein targeting (GO:1903533)	306	28	3.56	+	7.86	7.21e-13
positive regulation of developmental growth (GO:0048639)	164	15	1.91	+	7.86	1.26e-05
regulation of transferase activity (GO:0051338)	984	90	11.45	+	7.86	4.58e-51
developmental growth (GO:0048589)	350	32	4.07	+	7.86	3.98e-15
negative regulation of mitotic cell cycle phase transition (GO:1901991)	197	18	2.29	+	7.85	2.84e-07
multicellular organismal homeostasis (GO:0048871)	285	26	3.32	+	7.84	1.03e-11
response to organonitrogen compound (GO:0010243)	880	80	10.24	+	7.81	3.31e-44
negative regulation of chromosome organization (GO:2001251)	110	10	1.28	+	7.81	0.00752
cell-matrix adhesion (GO:0007160)	121	11	1.41	+	7.81	0.00213
G1/S transition of mitotic cell cycle (GO:0000082)	121	11	1.41	+	7.81	0.00213
myeloid cell differentiation (GO:0030099)	187	17	2.18	+	7.81	1.09e-06
response to steroid hormone (GO:0048545)	330	30	3.84	+	7.81	6.34e-14
positive regulation of chromosome organization (GO:2001252)	155	14	1.8	+	7.76	5.25e-05
regulation of developmental growth (GO:0048638)	299	27	3.48	+	7.76	3.63e-12
morphogenesis of embryonic epithelium (GO:0016331)	144	13	1.68	+	7.76	0.000185
response to radiation (GO:0009314)	421	38	4.9	+	7.76	2.22e-18
cell cycle G1/S phase transition (GO:0044843)	122	11	1.42	+	7.75	0.00231
positive regulation of locomotion (GO:0040017)	455	41	5.29	+	7.75	4.43e-20
heart development (GO:0007507)	479	43	5.57	+	7.72	3.56e-21
single organism cell adhesion (GO:0098602)	268	24	3.12	+	7.7	2.02e-10
positive regulation of NF-kappaB transcription factor activity (GO:0051092)	134	12	1.56	+	7.7	0.000708
regulation of MAPK cascade (GO:0043408)	670	60	7.8	+	7.7	3.36e-31
embryonic epithelial tube formation (GO:0001838)	123	11	1.43	+	7.69	0.0025
cellular response to oxidative stress (GO:0034599)	224	20	2.61	+	7.67	3.34e-08
positive regulation of hemopoiesis (GO:1903708)	168	15	1.95	+	7.67	1.74e-05
Wnt signaling pathway, planar cell polarity pathway (GO:0060071)	101	9	1.18	+	7.66	0.0312
cellular response to extracellular stimulus (GO:0031668)	202	18	2.35	+	7.66	4.23e-07
regulation of glucose metabolic process (GO:0010906)	101	9	1.18	+	7.66	0.0312
retina development in camera-type eye (GO:0060041)	135	12	1.57	+	7.64	0.000766
circadian rhythm (GO:0007623)	135	12	1.57	+	7.64	0.000766
positive regulation of cellular amide metabolic process (GO:0034250)	124	11	1.44	+	7.62	0.0027
anatomical structure formation involved in morphogenesis (GO:0048646)	824	73	9.59	+	7.61	6.06e-39
regulation of fat cell differentiation (GO:0045598)	113	10	1.31	+	7.61	0.00955
regulation of establishment of planar polarity (GO:0090175)	113	10	1.31	+	7.61	0.00955
hemopoiesis (GO:0030097)	520	46	6.05	+	7.6	1.18e-22
positive regulation of intracellular signal transduction (GO:1902533)	905	80	10.53	+	7.6	2.55e-43
striated muscle cell differentiation (GO:0051146)	181	16	2.11	+	7.6	5.76e-06
response to glucose (GO:0009749)	136	12	1.58	+	7.58	0.000829
regulation of histone modification (GO:0031056)	136	12	1.58	+	7.58	0.000829
positive regulation of transmembrane receptor protein serine/threonine kinase signaling pathway (GO:0090100)	102	9	1.19	+	7.58	0.0338
positive regulation of inflammatory response (GO:0050729)	102	9	1.19	+	7.58	0.0338
response to light stimulus (GO:0009416)	284	25	3.3	+	7.57	8.29e-11
response to endogenous stimulus (GO:0009719)	1264	111	14.71	+	7.55	4.95e-64
cell morphogenesis involved in differentiation (GO:0000904)	490	43	5.7	+	7.54	8.52e-21
response to nitrogen compound (GO:1901698)	981	86	11.41	+	7.53	6.32e-47
regulation of purine nucleotide metabolic process (GO:1900542)	217	19	2.52	+	7.53	1.63e-07
immune response-activating cell surface receptor signaling pathway (GO:0002429)	400	35	4.65	+	7.52	3.01e-16
antigen receptor-mediated signaling pathway (GO:0050851)	240	21	2.79	+	7.52	1.38e-08
negative regulation of cell cycle phase transition (GO:1901988)	206	18	2.4	+	7.51	5.78e-07
regulation of sequence-specific DNA binding transcription factor activity (GO:0051090)	378	33	4.4	+	7.5	4.15e-15
positive regulation of protein modification process (GO:0031401)	1146	100	13.33	+	7.5	4.37e-56
regulation of protein localization to membrane (GO:1905475)	149	13	1.73	+	7.5	0.000274
positive regulation of defense response (GO:0031349)	390	34	4.54	+	7.49	1.21e-15
positive regulation of cell cycle process (GO:0090068)	264	23	3.07	+	7.49	1.26e-09
negative regulation of cell cycle (GO:0045786)	540	47	6.28	+	7.48	6.13e-23
eye development (GO:0001654)	334	29	3.89	+	7.46	7.58e-13
axon development (GO:0061564)	369	32	4.29	+	7.45	1.79e-14
regulation of cytokine-mediated signaling pathway (GO:0001959)	150	13	1.75	+	7.45	0.000296
regulation of cell cycle G2/M phase transition (GO:1902749)	127	11	1.48	+	7.44	0.00341
regulation of gene silencing (GO:0060968)	104	9	1.21	+	7.44	0.0394
embryonic morphogenesis (GO:0048598)	555	48	6.46	+	7.43	2.15e-23
regulation of protein binding (GO:0043393)	185	16	2.15	+	7.43	7.84e-06
single organismal cell-cell adhesion (GO:0016337)	243	21	2.83	+	7.43	1.74e-08
regulation of G2/M transition of mitotic cell cycle (GO:0010389)	116	10	1.35	+	7.41	0.012
glycerophospholipid biosynthetic process (GO:0046474)	233	20	2.71	+	7.38	6.69e-08
glycerolipid biosynthetic process (GO:0045017)	245	21	2.85	+	7.37	2.02e-08
regulation of insulin secretion (GO:0050796)	175	15	2.04	+	7.37	2.99e-05
cell maturation (GO:0048469)	140	12	1.63	+	7.37	0.00113
regulation of cyclic nucleotide biosynthetic process (GO:0030802)	140	12	1.63	+	7.37	0.00113
female sex differentiation (GO:0046660)	105	9	1.22	+	7.37	0.0425
positive regulation of cellular protein localization (GO:1903829)	398	34	4.63	+	7.34	2.23e-15
regulation of intracellular protein transport (GO:0033157)	387	33	4.5	+	7.33	8.26e-15
negative regulation of cell cycle process (GO:0010948)	270	23	3.14	+	7.32	1.98e-09
response to drug (GO:0042493)	411	35	4.78	+	7.32	6.99e-16
cellular response to tumor necrosis factor (GO:0071356)	235	20	2.73	+	7.31	7.78e-08
immune response-regulating signaling pathway (GO:0002764)	529	45	6.15	+	7.31	2.13e-21
axonogenesis (GO:0007409)	341	29	3.97	+	7.31	1.29e-12
regulation of sequestering of calcium ion (GO:0051282)	106	9	1.23	+	7.3	0.0458
chemotaxis (GO:0006935)	483	41	5.62	+	7.3	3.91e-19
taxis (GO:0042330)	483	41	5.62	+	7.3	3.91e-19
regulation of nucleotide metabolic process (GO:0006140)	224	19	2.61	+	7.29	2.77e-07
striated muscle tissue development (GO:0014706)	272	23	3.16	+	7.27	2.3e-09
central nervous system neuron differentiation (GO:0021953)	166	14	1.93	+	7.25	0.000122
muscle cell differentiation (GO:0042692)	249	21	2.9	+	7.25	2.73e-08
positive regulation of growth (GO:0045927)	249	21	2.9	+	7.25	2.73e-08
lymphocyte activation (GO:0046649)	356	30	4.14	+	7.24	4.76e-13
regulation of cysteine-type endopeptidase activity involved in apoptotic process (GO:0043281)	202	17	2.35	+	7.23	3.48e-06
positive regulation of hormone secretion (GO:0046887)	119	10	1.38	+	7.22	0.0151
regulation of lipid metabolic process (GO:0019216)	369	31	4.29	+	7.22	1.51e-13
regulation of reproductive process (GO:2000241)	131	11	1.52	+	7.22	0.00461
T cell differentiation (GO:0030217)	131	11	1.52	+	7.22	0.00461
positive regulation of innate immune response (GO:0045089)	298	25	3.47	+	7.21	2.4e-10
male sex differentiation (GO:0046661)	155	13	1.8	+	7.21	0.000431
positive regulation of cell death (GO:0010942)	632	53	7.35	+	7.21	1.21e-25
cell morphogenesis (GO:0000902)	611	51	7.11	+	7.17	2.03e-24
regulation of cAMP biosynthetic process (GO:0030817)	120	10	1.4	+	7.16	0.0162
regulation of response to cytokine stimulus (GO:0060759)	156	13	1.81	+	7.16	0.000464
skeletal muscle organ development (GO:0060538)	132	11	1.54	+	7.16	0.00496
response to reactive oxygen species (GO:0000302)	180	15	2.09	+	7.16	4.33e-05
cell-cell signaling by wnt (GO:0198738)	349	29	4.06	+	7.14	2.33e-12
Wnt signaling pathway (GO:0016055)	349	29	4.06	+	7.14	2.33e-12
response to lipid (GO:0033993)	831	69	9.67	+	7.14	1.06e-34
negative regulation of cell proliferation (GO:0008285)	651	54	7.57	+	7.13	5.52e-26
intracellular signal transduction (GO:0035556)	1556	129	18.1	+	7.13	2.36e-74
hematopoietic or lymphoid organ development (GO:0048534)	567	47	6.6	+	7.12	4.71e-22
protein import (GO:0017038)	169	14	1.97	+	7.12	0.000153
response to organic cyclic compound (GO:0014070)	885	73	10.3	+	7.09	6.68e-37
regulation of signal transduction by p53 class mediator (GO:1901796)	170	14	1.98	+	7.08	0.000164
growth (GO:0040007)	413	34	4.81	+	7.08	6.77e-15
second-messenger-mediated signaling (GO:0019932)	158	13	1.84	+	7.07	0.000537
regulation of homeostatic process (GO:0032844)	462	38	5.38	+	7.07	5.09e-17
male gonad development (GO:0008584)	134	11	1.56	+	7.06	0.00574
regulation of cellular carbohydrate metabolic process (GO:0010675)	134	11	1.56	+	7.06	0.00574
development of primary male sexual characteristics (GO:0046546)	134	11	1.56	+	7.06	0.00574
learning (GO:0007612)	134	11	1.56	+	7.06	0.00574
response to tumor necrosis factor (GO:0034612)	256	21	2.98	+	7.05	4.55e-08
regulation of cellular response to growth factor stimulus (GO:0090287)	244	20	2.84	+	7.05	1.5e-07
immune system development (GO:0002520)	598	49	6.96	+	7.04	6.03e-23
regulation of cellular ketone metabolic process (GO:0010565)	171	14	1.99	+	7.04	0.000176
positive regulation of homeostatic process (GO:0032846)	208	17	2.42	+	7.02	5.38e-06
regulation of mRNA stability (GO:0043488)	147	12	1.71	+	7.02	0.00188
glycerophospholipid metabolic process (GO:0006650)	344	28	4	+	7	1.31e-11
negative regulation of hemopoiesis (GO:1903707)	123	10	1.43	+	6.99	0.0202
regulation of cellular protein localization (GO:1903827)	603	49	7.02	+	6.98	8.65e-23
regulation of hemopoiesis (GO:1903706)	321	26	3.73	+	6.96	1.58e-10
response to organophosphorus (GO:0046683)	136	11	1.58	+	6.95	0.00661
anterior/posterior pattern specification (GO:0009952)	198	16	2.3	+	6.95	2.03e-05
regulation of protein phosphorylation (GO:0001932)	1300	105	15.12	+	6.94	2.68e-56
muscle tissue development (GO:0060537)	285	23	3.32	+	6.94	5.9e-09
negative regulation of catabolic process (GO:0009895)	211	17	2.45	+	6.92	6.65e-06
cellular response to molecule of bacterial origin (GO:0071219)	149	12	1.73	+	6.92	0.00217
regulation of autophagy (GO:0010506)	298	24	3.47	+	6.92	1.9e-09
regulation of phosphorylation (GO:0042325)	1395	112	16.23	+	6.9	9.85e-61
regulation of cyclic nucleotide metabolic process (GO:0030799)	162	13	1.88	+	6.9	0.000713
positive regulation of peptidase activity (GO:0010952)	162	13	1.88	+	6.9	0.000713
regulation of innate immune response (GO:0045088)	399	32	4.64	+	6.89	1.62e-13
skeletal system morphogenesis (GO:0048705)	212	17	2.47	+	6.89	7.14e-06
response to purine-containing compound (GO:0014074)	150	12	1.75	+	6.88	0.00233
regulation of receptor activity (GO:0010469)	150	12	1.75	+	6.88	0.00233
skeletal muscle tissue development (GO:0007519)	125	10	1.45	+	6.88	0.0232
sensory organ development (GO:0007423)	513	41	5.97	+	6.87	3.47e-18
regulation of chromatin organization (GO:1902275)	163	13	1.9	+	6.85	0.000764
positive regulation of intracellular transport (GO:0032388)	339	27	3.94	+	6.85	7.19e-11
response to oxygen-containing compound (GO:1901700)	1410	112	16.4	+	6.83	2.95e-60
learning or memory (GO:0007611)	227	18	2.64	+	6.82	2.68e-06
cell morphogenesis involved in neuron differentiation (GO:0048667)	391	31	4.55	+	6.81	7.29e-13
chordate embryonic development (GO:0043009)	569	45	6.62	+	6.8	3.87e-20
DNA-templated transcription, initiation (GO:0006352)	190	15	2.21	+	6.79	8.8e-05
negative regulation of cellular catabolic process (GO:0031330)	152	12	1.77	+	6.79	0.00268
regulation of cell proliferation (GO:0042127)	1558	123	18.13	+	6.79	1.54e-67
animal organ morphogenesis (GO:0009887)	876	69	10.19	+	6.77	2.75e-33
positive regulation of programmed cell death (GO:0043068)	597	47	6.95	+	6.77	4e-21
regulation of cysteine-type endopeptidase activity (GO:2000116)	216	17	2.51	+	6.76	9.41e-06
regulation of peptide hormone secretion (GO:0090276)	204	16	2.37	+	6.74	3.08e-05
embryo development ending in birth or egg hatching (GO:0009792)	574	45	6.68	+	6.74	5.48e-20
immune response-activating signal transduction (GO:0002757)	498	39	5.79	+	6.73	7.93e-17
cell chemotaxis (GO:0060326)	179	14	2.08	+	6.72	0.000308
regulation of STAT cascade (GO:1904892)	141	11	1.64	+	6.71	0.00935
regulation of JAK-STAT cascade (GO:0046425)	141	11	1.64	+	6.71	0.00935
regulation of programmed cell death (GO:0043067)	1437	112	16.72	+	6.7	2.06e-59
regulation of cell size (GO:0008361)	154	12	1.79	+	6.7	0.00307
positive regulation of apoptotic process (GO:0043065)	591	46	6.88	+	6.69	2.17e-20
phosphorylation (GO:0016310)	1287	100	14.97	+	6.68	1.73e-51
positive regulation of signal transduction (GO:0009967)	1443	112	16.79	+	6.67	3.16e-59
cytokine production (GO:0001816)	129	10	1.5	+	6.66	0.0305
protein acetylation (GO:0006473)	129	10	1.5	+	6.66	0.0305
phospholipid biosynthetic process (GO:0008654)	271	21	3.15	+	6.66	1.29e-07
positive regulation of cell differentiation (GO:0045597)	865	67	10.06	+	6.66	1.03e-31
regulation of apoptotic process (GO:0042981)	1423	110	16.56	+	6.64	9.99e-58
positive regulation of cellular protein metabolic process (GO:0032270)	1449	112	16.86	+	6.64	4.83e-59
regulation of protein modification by small protein conjugation or removal (GO:1903320)	285	22	3.32	+	6.63	4.47e-08
in utero embryonic development (GO:0001701)	324	25	3.77	+	6.63	1.49e-09
response to abiotic stimulus (GO:0009628)	1089	84	12.67	+	6.63	2.08e-41
bone development (GO:0060348)	169	13	1.97	+	6.61	0.00115
negative regulation of apoptotic signaling pathway (GO:2001234)	208	16	2.42	+	6.61	4.04e-05
cellular response to biotic stimulus (GO:0071216)	169	13	1.97	+	6.61	0.00115
epithelial cell development (GO:0002064)	182	14	2.12	+	6.61	0.000377
regulation of leukocyte differentiation (GO:1902105)	247	19	2.87	+	6.61	1.4e-06
cellular response to lipopolysaccharide (GO:0071222)	143	11	1.66	+	6.61	0.0107
response to lipopolysaccharide (GO:0032496)	299	23	3.48	+	6.61	1.54e-08
regulation of RNA stability (GO:0043487)	156	12	1.81	+	6.61	0.00351
gonad development (GO:0008406)	209	16	2.43	+	6.58	4.32e-05
negative regulation of transferase activity (GO:0051348)	366	28	4.26	+	6.58	5.93e-11
positive regulation of chemotaxis (GO:0050921)	131	10	1.52	+	6.56	0.0349
sex differentiation (GO:0007548)	262	20	3.05	+	6.56	5.2e-07
regulation of mitotic cell cycle phase transition (GO:1901990)	328	25	3.82	+	6.55	1.94e-09
neuron projection morphogenesis (GO:0048812)	433	33	5.04	+	6.55	2.13e-13
response to molecule of bacterial origin (GO:0002237)	315	24	3.66	+	6.55	6.05e-09
positive regulation of multi-organism process (GO:0043902)	197	15	2.29	+	6.54	0.000141
regulation of cell death (GO:0010941)	1537	117	17.88	+	6.54	1.12e-61
developmental maturation (GO:0021700)	211	16	2.45	+	6.52	4.92e-05
positive regulation of protein metabolic process (GO:0051247)	1543	117	17.95	+	6.52	1.7e-61
phagocytosis (GO:0006909)	277	21	3.22	+	6.52	1.92e-07
regulation of ion homeostasis (GO:2000021)	198	15	2.3	+	6.51	0.000151
cellular response to organic substance (GO:0071310)	1967	149	22.89	+	6.51	2e-84
cellular component morphogenesis (GO:0032989)	701	53	8.16	+	6.5	1.56e-23
regulation of muscle cell differentiation (GO:0051147)	172	13	2	+	6.5	0.0014
plasma membrane bounded cell projection morphogenesis (GO:0120039)	437	33	5.08	+	6.49	2.77e-13
apoptotic process (GO:0006915)	903	68	10.51	+	6.47	1.55e-31
positive regulation of response to external stimulus (GO:0032103)	266	20	3.09	+	6.46	6.76e-07
regulation of transmembrane receptor protein serine/threonine kinase signaling pathway (GO:0090092)	213	16	2.48	+	6.46	5.61e-05
regulation of macroautophagy (GO:0016241)	160	12	1.86	+	6.45	0.00456
cell projection morphogenesis (GO:0048858)	441	33	5.13	+	6.43	3.6e-13
negative regulation of binding (GO:0051100)	147	11	1.71	+	6.43	0.0139
negative regulation of protein modification by small protein conjugation or removal (GO:1903321)	147	11	1.71	+	6.43	0.0139
positive regulation of cell adhesion (GO:0045785)	401	30	4.67	+	6.43	1.08e-11
regulation of cellular response to stress (GO:0080135)	615	46	7.16	+	6.43	1.08e-19
development of primary sexual characteristics (GO:0045137)	214	16	2.49	+	6.43	5.99e-05
embryo development (GO:0009790)	923	69	10.74	+	6.43	6.78e-32
small GTPase mediated signal transduction (GO:0007264)	281	21	3.27	+	6.42	2.49e-07
regulation of mitotic cell cycle (GO:0007346)	523	39	6.08	+	6.41	4.2e-16
female pregnancy (GO:0007565)	188	14	2.19	+	6.4	0.000558
positive regulation of neurogenesis (GO:0050769)	403	30	4.69	+	6.4	1.23e-11
glycerolipid metabolic process (GO:0046486)	417	31	4.85	+	6.39	4.14e-12
cellular response to inorganic substance (GO:0071241)	175	13	2.04	+	6.38	0.0017
regulation of hormone secretion (GO:0046883)	256	19	2.98	+	6.38	2.52e-06
embryonic organ development (GO:0048568)	418	31	4.86	+	6.37	4.41e-12
embryonic organ morphogenesis (GO:0048562)	284	21	3.3	+	6.36	3.02e-07
negative regulation of cell adhesion (GO:0007162)	230	17	2.68	+	6.35	2.37e-05
regulation of stress-activated MAPK cascade (GO:0032872)	203	15	2.36	+	6.35	0.000208
positive regulation of cell communication (GO:0010647)	1570	116	18.27	+	6.35	1.23e-59
negative regulation of MAPK cascade (GO:0043409)	149	11	1.73	+	6.35	0.0158
regulation of cell adhesion (GO:0030155)	664	49	7.73	+	6.34	5.49e-21
regulation of catabolic process (GO:0009894)	775	57	9.02	+	6.32	4.66e-25
response to ethanol (GO:0045471)	136	10	1.58	+	6.32	0.0483
regulation of stress-activated protein kinase signaling cascade (GO:0070302)	204	15	2.37	+	6.32	0.000222
positive regulation of signaling (GO:0023056)	1578	116	18.36	+	6.32	2.1e-59
leukocyte migration (GO:0050900)	354	26	4.12	+	6.31	1.44e-09
positive regulation of cell-cell adhesion (GO:0022409)	259	19	3.01	+	6.31	3.05e-06
regulation of growth (GO:0040008)	641	47	7.46	+	6.3	7.48e-20
activation of immune response (GO:0002253)	547	40	6.36	+	6.29	2.61e-16
regulation of chemotaxis (GO:0050920)	178	13	2.07	+	6.28	0.00206
cognition (GO:0050890)	261	19	3.04	+	6.26	3.46e-06
positive regulation of T cell activation (GO:0050870)	220	16	2.56	+	6.25	8.76e-05
regulation of lipid biosynthetic process (GO:0046890)	165	12	1.92	+	6.25	0.00628
regulation of protein ubiquitination (GO:0031396)	262	19	3.05	+	6.23	3.68e-06
regulation of phosphate metabolic process (GO:0019220)	1633	118	19	+	6.21	6.53e-60
regulation of protein modification process (GO:0031399)	1680	121	19.55	+	6.19	1.02e-61
cell proliferation (GO:0008283)	681	49	7.92	+	6.18	1.62e-20
positive regulation of immune response (GO:0050778)	723	52	8.41	+	6.18	5.07e-22
regulation of phosphorus metabolic process (GO:0051174)	1647	118	19.16	+	6.16	1.63e-59
positive regulation of immune system process (GO:0002684)	1005	72	11.69	+	6.16	2.21e-32
regulation of cell cycle (GO:0051726)	1019	73	11.86	+	6.16	6.39e-33
regulation of cell-cell adhesion (GO:0022407)	405	29	4.71	+	6.15	9.95e-11
muscle structure development (GO:0061061)	447	32	5.2	+	6.15	3.81e-12
regulation of Ras protein signal transduction (GO:0046578)	210	15	2.44	+	6.14	0.000322
cell part morphogenesis (GO:0032990)	462	33	5.38	+	6.14	1.36e-12
regulation of apoptotic signaling pathway (GO:2001233)	380	27	4.42	+	6.11	1.04e-09
regulation of cell cycle phase transition (GO:1901987)	352	25	4.1	+	6.1	8.91e-09
regulation of intracellular transport (GO:0032386)	552	39	6.42	+	6.07	2.6e-15
regulation of cellular catabolic process (GO:0031329)	652	46	7.59	+	6.06	1.11e-18
response to corticosteroid (GO:0031960)	156	11	1.81	+	6.06	0.0244
regulation of cell migration (GO:0030334)	695	49	8.09	+	6.06	3.84e-20
cell surface receptor signaling pathway involved in cell-cell signaling (GO:1905114)	426	30	4.96	+	6.05	5.15e-11
regionalization (GO:0003002)	313	22	3.64	+	6.04	2.64e-07
regulation of calcium ion transport (GO:0051924)	214	15	2.49	+	6.02	0.00041
positive regulation of cell activation (GO:0050867)	371	26	4.32	+	6.02	4.12e-09
positive regulation of cell growth (GO:0030307)	157	11	1.83	+	6.02	0.0259
negative regulation of protein kinase activity (GO:0006469)	243	17	2.83	+	6.01	5.29e-05
developmental process involved in reproduction (GO:0003006)	629	44	7.32	+	6.01	1.46e-17
positive regulation of molecular function (GO:0044093)	1916	134	22.29	+	6.01	6e-69
phospholipid metabolic process (GO:0006644)	415	29	4.83	+	6.01	1.83e-10
positive regulation of leukocyte cell-cell adhesion (GO:1903039)	229	16	2.66	+	6.01	0.000152
positive regulation of cytokine production (GO:0001819)	387	27	4.5	+	6	1.58e-09
response to nutrient (GO:0007584)	172	12	2	+	6	0.00962
response to nutrient levels (GO:0031667)	416	29	4.84	+	5.99	1.94e-10
regulation of cell motility (GO:2000145)	748	52	8.7	+	5.98	2.35e-21
positive regulation of catalytic activity (GO:0043085)	1612	112	18.75	+	5.97	2.48e-54
positive regulation of nucleobase-containing compound metabolic process (GO:0045935)	1684	117	19.59	+	5.97	1.89e-57
positive regulation of protein transport (GO:0051222)	476	33	5.54	+	5.96	3.16e-12
negative regulation of kinase activity (GO:0033673)	260	18	3.02	+	5.95	2.2e-05
regulation of protein transport (GO:0051223)	767	53	8.92	+	5.94	9.96e-22
tissue homeostasis (GO:0001894)	174	12	2.02	+	5.93	0.0108
positive regulation of developmental process (GO:0051094)	1207	83	14.04	+	5.91	3.94e-37
positive regulation of cellular biosynthetic process (GO:0031328)	1761	121	20.49	+	5.91	1.82e-59
regulation of cytokine production (GO:0001817)	597	41	6.95	+	5.9	7.72e-16
positive regulation of biosynthetic process (GO:0009891)	1791	123	20.84	+	5.9	1.01e-60
cell junction organization (GO:0034330)	190	13	2.21	+	5.88	0.00426
sensory organ morphogenesis (GO:0090596)	250	17	2.91	+	5.84	7.97e-05
negative regulation of signal transduction (GO:0009968)	1134	77	13.19	+	5.84	1.59e-33
peptidyl-amino acid modification (GO:0018193)	871	59	10.13	+	5.82	2.87e-24
regulation of protein localization (GO:0032880)	1005	68	11.69	+	5.82	9.29e-29
regulation of establishment of protein localization (GO:0070201)	843	57	9.81	+	5.81	3.04e-23
positive regulation of macromolecule biosynthetic process (GO:0010557)	1628	110	18.94	+	5.81	6.64e-52
regulation of cellular localization (GO:0060341)	875	59	10.18	+	5.8	3.63e-24
positive regulation of establishment of protein localization (GO:1904951)	534	36	6.21	+	5.79	2.99e-13
response to extracellular stimulus (GO:0009991)	446	30	5.19	+	5.78	1.67e-10
cell-cell junction organization (GO:0045216)	164	11	1.91	+	5.76	0.0391
positive regulation of nervous system development (GO:0051962)	464	31	5.4	+	5.74	7.09e-11
positive regulation of transcription from RNA polymerase II promoter (GO:0045944)	1064	71	12.38	+	5.74	6.37e-30
positive regulation of proteolysis (GO:0045862)	375	25	4.36	+	5.73	3.43e-08
regulation of cell growth (GO:0001558)	390	26	4.54	+	5.73	1.25e-08
regulation of chromosome organization (GO:0033044)	300	20	3.49	+	5.73	5.29e-06
regulation of JNK cascade (GO:0046328)	165	11	1.92	+	5.73	0.0413
regulation of peptide transport (GO:0090087)	796	53	9.26	+	5.72	5.45e-21
negative regulation of cell communication (GO:0010648)	1232	82	14.33	+	5.72	1.45e-35
response to inorganic substance (GO:0010035)	466	31	5.42	+	5.72	7.94e-11
positive regulation of cellular catabolic process (GO:0031331)	361	24	4.2	+	5.71	9.99e-08
regulation of cell cycle process (GO:0010564)	602	40	7	+	5.71	7.07e-15
protein deubiquitination (GO:0016579)	286	19	3.33	+	5.71	1.52e-05
regulation of leukocyte proliferation (GO:0070663)	211	14	2.45	+	5.7	0.00222
negative regulation of signaling (GO:0023057)	1236	82	14.38	+	5.7	1.84e-35
positive regulation of leukocyte activation (GO:0002696)	362	24	4.21	+	5.7	1.06e-07
programmed cell death (GO:0012501)	1026	68	11.94	+	5.7	3.16e-28
cellular response to chemical stimulus (GO:0070887)	2416	160	28.11	+	5.69	1.91e-84
regulation of immune response (GO:0050776)	1012	67	11.77	+	5.69	1.07e-27
anatomical structure homeostasis (GO:0060249)	287	19	3.34	+	5.69	1.61e-05
cell migration (GO:0016477)	847	56	9.85	+	5.68	2.77e-22
regulation of intracellular signal transduction (GO:1902531)	1740	115	20.24	+	5.68	6.06e-54
cellular response to cytokine stimulus (GO:0071345)	651	43	7.57	+	5.68	3.67e-16
regulation of locomotion (GO:0040012)	818	54	9.52	+	5.67	2.69e-21
regulation of cellular component movement (GO:0051270)	820	54	9.54	+	5.66	3.02e-21
response to cytokine (GO:0034097)	746	49	8.68	+	5.65	7.64e-19
positive regulation of I-kappaB kinase/NF-kappaB signaling (GO:0043123)	183	12	2.13	+	5.64	0.0181
negative regulation of cytokine production (GO:0001818)	229	15	2.66	+	5.63	0.000971
positive regulation of lymphocyte activation (GO:0051251)	336	22	3.91	+	5.63	9.93e-07
negative regulation of protein modification process (GO:0031400)	596	39	6.93	+	5.62	3.37e-14
positive regulation of nucleic acid-templated transcription (GO:1903508)	1378	90	16.03	+	5.61	3.23e-39
positive regulation of transcription, DNA-templated (GO:0045893)	1378	90	16.03	+	5.61	3.23e-39
positive regulation of RNA biosynthetic process (GO:1902680)	1379	90	16.04	+	5.61	3.42e-39
positive regulation of protein ubiquitination (GO:0031398)	184	12	2.14	+	5.61	0.0191
positive regulation of response to stimulus (GO:0048584)	2088	136	24.29	+	5.6	1.79e-66
cell death (GO:0008219)	1061	69	12.34	+	5.59	3.09e-28
positive regulation of protein modification by small protein conjugation or removal (GO:1903322)	200	13	2.33	+	5.59	0.00749
neuron projection development (GO:0031175)	602	39	7	+	5.57	4.69e-14
negative regulation of developmental process (GO:0051093)	835	54	9.71	+	5.56	7e-21
multi-multicellular organism process (GO:0044706)	217	14	2.52	+	5.55	0.00309
cell surface receptor signaling pathway (GO:0007166)	2217	143	25.79	+	5.54	1.27e-70
neuron differentiation (GO:0030182)	931	60	10.83	+	5.54	1.21e-23
regulation of response to stress (GO:0080134)	1382	89	16.08	+	5.54	3.36e-38
positive regulation of RNA metabolic process (GO:0051254)	1429	92	16.63	+	5.53	8.58e-40
positive regulation of cell development (GO:0010720)	466	30	5.42	+	5.53	5.09e-10
muscle organ development (GO:0007517)	281	18	3.27	+	5.51	7.17e-05
regulation of lymphocyte proliferation (GO:0050670)	203	13	2.36	+	5.5	0.00881
ossification (GO:0001503)	251	16	2.92	+	5.48	0.000526
regulation of mononuclear cell proliferation (GO:0032944)	204	13	2.37	+	5.48	0.0093
positive regulation of gene expression (GO:0010628)	1720	109	20.01	+	5.45	1.36e-48
cell activation (GO:0001775)	1026	65	11.94	+	5.45	1.25e-25
regulation of T cell activation (GO:0050863)	316	20	3.68	+	5.44	1.27e-05
response to organic substance (GO:0010033)	2612	165	30.39	+	5.43	3.87e-85
negative regulation of protein phosphorylation (GO:0001933)	396	25	4.61	+	5.43	1.08e-07
regulation of symbiosis, encompassing mutualism through parasitism (GO:0043903)	270	17	3.14	+	5.41	0.00024
protein modification by small protein removal (GO:0070646)	302	19	3.51	+	5.41	3.64e-05
positive regulation of hydrolase activity (GO:0051345)	954	60	11.1	+	5.41	4.27e-23
homeostasis of number of cells (GO:0048872)	191	12	2.22	+	5.4	0.0279
cytokine-mediated signaling pathway (GO:0019221)	478	30	5.56	+	5.39	9.68e-10
regulation of cell activation (GO:0050865)	559	35	6.5	+	5.38	7.68e-12
negative regulation of phosphorylation (GO:0042326)	432	27	5.03	+	5.37	1.96e-08
regulation of immune system process (GO:0002682)	1448	90	16.85	+	5.34	1.62e-37
positive regulation of GTPase activity (GO:0043547)	660	41	7.68	+	5.34	2.56e-14
T cell activation (GO:0042110)	226	14	2.63	+	5.32	0.00498
regulation of defense response (GO:0031347)	745	46	8.67	+	5.31	2.12e-16
regulation of protein stability (GO:0031647)	243	15	2.83	+	5.31	0.00205
localization of cell (GO:0051674)	943	58	10.97	+	5.29	1.1e-21
cell motility (GO:0048870)	943	58	10.97	+	5.29	1.1e-21
forebrain development (GO:0030900)	374	23	4.35	+	5.29	1.23e-06
positive regulation of nitrogen compound metabolic process (GO:0051173)	2814	173	32.74	+	5.28	1.8e-89
regulation of endocytosis (GO:0030100)	212	13	2.47	+	5.27	0.0141
negative regulation of multicellular organismal process (GO:0051241)	1012	62	11.77	+	5.27	1.98e-23
positive regulation of macromolecule metabolic process (GO:0010604)	2892	177	33.65	+	5.26	2.41e-92
head development (GO:0060322)	720	44	8.38	+	5.25	2.32e-15
positive regulation of cellular metabolic process (GO:0031325)	2917	178	33.94	+	5.24	6.13e-93
anatomical structure morphogenesis (GO:0009653)	1952	119	22.71	+	5.24	1.24e-52
negative regulation of response to stimulus (GO:0048585)	1411	86	16.42	+	5.24	8.03e-35
regulation of protein catabolic process (GO:0042176)	394	24	4.58	+	5.24	5.83e-07
regulation of cellular protein catabolic process (GO:1903362)	263	16	3.06	+	5.23	0.000981
positive regulation of multicellular organismal process (GO:0051240)	1464	89	17.03	+	5.23	2.99e-36
negative regulation of protein metabolic process (GO:0051248)	1087	66	12.65	+	5.22	4.6e-25
viral process (GO:0016032)	610	37	7.1	+	5.21	2.85e-12
response to oxidative stress (GO:0006979)	363	22	4.22	+	5.21	4.13e-06
negative regulation of cellular protein metabolic process (GO:0032269)	1023	62	11.9	+	5.21	3.51e-23
regulation of leukocyte cell-cell adhesion (GO:1903037)	331	20	3.85	+	5.19	2.75e-05
mitotic cell cycle phase transition (GO:0044772)	265	16	3.08	+	5.19	0.00109
regulation of lymphocyte activation (GO:0051249)	466	28	5.42	+	5.16	1.88e-08
regulation of GTPase activity (GO:0043087)	717	43	8.34	+	5.15	1.24e-14
negative regulation of transcription from RNA polymerase II promoter (GO:0000122)	772	46	8.98	+	5.12	8.42e-16
regulation of protein secretion (GO:0050708)	403	24	4.69	+	5.12	9.15e-07
epithelium development (GO:0060429)	1061	63	12.34	+	5.1	3.68e-23
neuron development (GO:0048666)	742	44	8.63	+	5.1	7.07e-15
pattern specification process (GO:0007389)	405	24	4.71	+	5.09	1.01e-06
positive regulation of catabolic process (GO:0009896)	422	25	4.91	+	5.09	4.08e-07
response to metal ion (GO:0010038)	321	19	3.73	+	5.09	9.54e-05
mitotic cell cycle (GO:0000278)	693	41	8.06	+	5.09	1.37e-13
negative regulation of phosphate metabolic process (GO:0045936)	559	33	6.5	+	5.07	2.78e-10
locomotion (GO:0040011)	1169	69	13.6	+	5.07	9.75e-26
regulation of peptidase activity (GO:0052547)	407	24	4.74	+	5.07	1.11e-06
negative regulation of phosphorus metabolic process (GO:0010563)	560	33	6.52	+	5.06	2.92e-10
regulation of anatomical structure morphogenesis (GO:0022603)	951	56	11.06	+	5.06	7.01e-20
regulation of proteolysis involved in cellular protein catabolic process (GO:1903050)	238	14	2.77	+	5.06	0.0091
cell cycle phase transition (GO:0044770)	273	16	3.18	+	5.04	0.00161
posttranscriptional regulation of gene expression (GO:0010608)	529	31	6.15	+	5.04	2.15e-09
negative regulation of intracellular signal transduction (GO:1902532)	478	28	5.56	+	5.03	3.39e-08
positive regulation of metabolic process (GO:0009893)	3129	183	36.4	+	5.03	6.81e-94
brain development (GO:0007420)	684	40	7.96	+	5.03	5.26e-13
regulation of small GTPase mediated signal transduction (GO:0051056)	308	18	3.58	+	5.02	0.000284
symbiosis, encompassing mutualism through parasitism (GO:0044403)	789	46	9.18	+	5.01	1.95e-15
regulation of cellular protein metabolic process (GO:0032268)	2436	142	28.34	+	5.01	2.96e-64
regulation of cell differentiation (GO:0045595)	1544	90	17.96	+	5.01	2.48e-35
mitotic cell cycle process (GO:1903047)	635	37	7.39	+	5.01	9.83e-12
interspecies interaction between organisms (GO:0044419)	791	46	9.2	+	5	2.15e-15
regulation of multicellular organismal development (GO:2000026)	1738	101	20.22	+	4.99	9.17e-41
regulation of I-kappaB kinase/NF-kappaB signaling (GO:0043122)	241	14	2.8	+	4.99	0.0105
skeletal system development (GO:0001501)	466	27	5.42	+	4.98	1.07e-07
negative regulation of catalytic activity (GO:0043086)	866	50	10.08	+	4.96	6.15e-17
negative regulation of nervous system development (GO:0051961)	260	15	3.02	+	4.96	0.00475
negative regulation of cellular component organization (GO:0051129)	607	35	7.06	+	4.96	8.53e-11
positive regulation of protein complex assembly (GO:0031334)	226	13	2.63	+	4.94	0.0281
generation of neurons (GO:0048699)	1394	80	16.22	+	4.93	4.83e-30
regulation of inflammatory response (GO:0050727)	366	21	4.26	+	4.93	2.69e-05
organophosphate biosynthetic process (GO:0090407)	506	29	5.89	+	4.93	2.29e-08
tissue development (GO:0009888)	1643	94	19.12	+	4.92	1.17e-36
regulation of leukocyte activation (GO:0002694)	525	30	6.11	+	4.91	1.01e-08
regulation of actin cytoskeleton organization (GO:0032956)	298	17	3.47	+	4.9	0.000965
regulation of multi-organism process (GO:0043900)	421	24	4.9	+	4.9	2.17e-06
regulation of hydrolase activity (GO:0051336)	1386	79	16.13	+	4.9	2.24e-29
neurogenesis (GO:0022008)	1492	85	17.36	+	4.9	3.62e-32
regulation of catalytic activity (GO:0050790)	2447	139	28.47	+	4.88	5.76e-61
cell development (GO:0048468)	1465	83	17.04	+	4.87	4.71e-31
negative regulation of hydrolase activity (GO:0051346)	407	23	4.74	+	4.86	6.17e-06
skin development (GO:0043588)	372	21	4.33	+	4.85	3.56e-05
chemical homeostasis (GO:0048878)	957	54	11.13	+	4.85	3.57e-18
regulation of signal transduction (GO:0009966)	2783	156	32.38	+	4.82	5.03e-71
phosphate-containing compound metabolic process (GO:0006796)	2092	117	24.34	+	4.81	1.36e-47
negative regulation of organelle organization (GO:0010639)	322	18	3.75	+	4.8	0.000547
regulation of peptide secretion (GO:0002791)	430	24	5	+	4.8	3.3e-06
negative regulation of cell differentiation (GO:0045596)	628	35	7.31	+	4.79	2.28e-10
regulation of cytoskeleton organization (GO:0051493)	449	25	5.22	+	4.79	1.46e-06
cell cycle process (GO:0022402)	1006	56	11.7	+	4.78	9.85e-19
cellular process involved in reproduction in multicellular organism (GO:0022412)	272	15	3.16	+	4.74	0.00827
regulation of response to external stimulus (GO:0032101)	746	41	8.68	+	4.72	1.68e-12
regulation of protein metabolic process (GO:0051246)	2684	147	31.23	+	4.71	7.61e-64
regulation of developmental process (GO:0050793)	2284	125	26.57	+	4.7	6.06e-51
regulation of cellular component biogenesis (GO:0044087)	825	45	9.6	+	4.69	6.11e-14
positive regulation of cellular component organization (GO:0051130)	1180	64	13.73	+	4.66	1.73e-21
positive regulation of organelle organization (GO:0010638)	611	33	7.11	+	4.64	3.12e-09
regulation of cell communication (GO:0010646)	3086	166	35.9	+	4.62	3.64e-75
regulation of molecular function (GO:0065009)	3032	163	35.28	+	4.62	4.48e-73
negative regulation of molecular function (GO:0044092)	1136	61	13.22	+	4.62	5.02e-20
phosphorus metabolic process (GO:0006793)	2185	117	25.42	+	4.6	1.18e-45
regulation of neurogenesis (GO:0050767)	693	37	8.06	+	4.59	1.41e-10
regulation of hormone levels (GO:0010817)	487	26	5.67	+	4.59	1.5e-06
regulation of secretion by cell (GO:1903530)	638	34	7.42	+	4.58	1.92e-09
regulation of actin filament-based process (GO:0032970)	339	18	3.94	+	4.56	0.00116
positive regulation of transport (GO:0051050)	942	50	10.96	+	4.56	2.01e-15
regulation of protein complex assembly (GO:0043254)	396	21	4.61	+	4.56	0.000104
regulation of signaling (GO:0023051)	3139	166	36.52	+	4.55	4.88e-74
regulation of endopeptidase activity (GO:0052548)	380	20	4.42	+	4.52	0.000264
regulation of nervous system development (GO:0051960)	782	41	9.1	+	4.51	8.19e-12
positive regulation of neuron differentiation (GO:0045666)	326	17	3.79	+	4.48	0.00334
regulation of cell development (GO:0060284)	806	42	9.38	+	4.48	4.29e-12
endocytosis (GO:0006897)	596	31	6.93	+	4.47	4.43e-08
positive regulation of cell projection organization (GO:0031346)	327	17	3.8	+	4.47	0.00348
central nervous system development (GO:0007417)	885	46	10.3	+	4.47	1.53e-13
regulation of multicellular organismal process (GO:0051239)	2685	138	31.24	+	4.42	5.38e-55
negative regulation of transport (GO:0051051)	467	24	5.43	+	4.42	1.64e-05
positive regulation of cellular component biogenesis (GO:0044089)	471	24	5.48	+	4.38	1.93e-05
regulation of cellular component size (GO:0032535)	334	17	3.89	+	4.37	0.00464
interaction with host (GO:0051701)	295	15	3.43	+	4.37	0.0221
regulation of secretion (GO:0051046)	698	35	8.12	+	4.31	4.59e-09
regulation of supramolecular fiber organization (GO:1902903)	300	15	3.49	+	4.3	0.027
cellular response to stress (GO:0033554)	1561	78	18.16	+	4.29	3.72e-25
homeostatic process (GO:0042592)	1443	72	16.79	+	4.29	1.07e-22
movement of cell or subcellular component (GO:0006928)	1425	71	16.58	+	4.28	2.89e-22
regulation of transcription from RNA polymerase II promoter (GO:0006357)	1908	95	22.2	+	4.28	3.03e-32
cell cycle (GO:0007049)	1333	66	15.51	+	4.26	3.68e-20
transcription from RNA polymerase II promoter (GO:0006366)	791	39	9.2	+	4.24	3.1e-10
biological adhesion (GO:0022610)	874	43	10.17	+	4.23	1.35e-11
negative regulation of proteolysis (GO:0045861)	327	16	3.8	+	4.21	0.0166
leukocyte activation (GO:0045321)	879	43	10.23	+	4.2	1.64e-11
single organism reproductive process (GO:0044702)	1213	59	14.11	+	4.18	3.93e-17
regulation of system process (GO:0044057)	494	24	5.75	+	4.18	4.79e-05
regulation of proteolysis (GO:0030162)	803	39	9.34	+	4.17	4.96e-10
regulation of transport (GO:0051049)	1858	90	21.62	+	4.16	3.59e-29
cell adhesion (GO:0007155)	868	42	10.1	+	4.16	5.28e-11
regulation of cellular amide metabolic process (GO:0034248)	434	21	5.05	+	4.16	0.000481
response to chemical (GO:0042221)	3897	188	45.34	+	4.15	2.6e-83
response to external stimulus (GO:0009605)	1808	87	21.04	+	4.14	1.02e-27
reproductive process (GO:0022414)	1351	65	15.72	+	4.14	4.09e-19
reproduction (GO:0000003)	1352	65	15.73	+	4.13	4.26e-19
cell-cell adhesion (GO:0098609)	437	21	5.08	+	4.13	0.000539
negative regulation of nucleobase-containing compound metabolic process (GO:0045934)	1357	65	15.79	+	4.12	5.17e-19
regulation of translation (GO:0006417)	398	19	4.63	+	4.1	0.00258
single-organism behavior (GO:0044708)	399	19	4.64	+	4.09	0.00268
regulation of response to stimulus (GO:0048583)	3761	179	43.76	+	4.09	9.45e-76
epithelial cell differentiation (GO:0030855)	653	31	7.6	+	4.08	4.24e-07
negative regulation of transcription, DNA-templated (GO:0045892)	1117	53	13	+	4.08	1.72e-14
positive regulation of secretion by cell (GO:1903532)	339	16	3.94	+	4.06	0.0262
negative regulation of nitrogen compound metabolic process (GO:0051172)	2249	106	26.17	+	4.05	4.67e-35
response to bacterium (GO:0009617)	553	26	6.43	+	4.04	2.09e-05
establishment of protein localization to organelle (GO:0072594)	383	18	4.46	+	4.04	0.00664
epidermis development (GO:0008544)	405	19	4.71	+	4.03	0.00334
regulation of localization (GO:0032879)	2553	119	29.7	+	4.01	1.74e-40
plasma membrane bounded cell projection organization (GO:0120036)	994	46	11.56	+	3.98	1.12e-11
nervous system development (GO:0007399)	2205	102	25.65	+	3.98	1.29e-32
histone modification (GO:0016570)	346	16	4.03	+	3.97	0.0338
negative regulation of cellular metabolic process (GO:0031324)	2405	111	27.98	+	3.97	1.98e-36
lipid biosynthetic process (GO:0008610)	567	26	6.6	+	3.94	3.47e-05
negative regulation of nucleic acid-templated transcription (GO:1903507)	1160	53	13.5	+	3.93	8.49e-14
negative regulation of RNA metabolic process (GO:0051253)	1205	55	14.02	+	3.92	1.87e-14
negative regulation of RNA biosynthetic process (GO:1902679)	1162	53	13.52	+	3.92	9.13e-14
cellular calcium ion homeostasis (GO:0006874)	373	17	4.34	+	3.92	0.0203
regulation of organelle organization (GO:0033043)	1190	54	13.85	+	3.9	5.24e-14
regulation of anatomical structure size (GO:0090066)	465	21	5.41	+	3.88	0.00149
organophosphate metabolic process (GO:0019637)	977	44	11.37	+	3.87	1.32e-10
cell projection organization (GO:0030030)	1024	46	11.91	+	3.86	3.3e-11
negative regulation of cellular macromolecule biosynthetic process (GO:2000113)	1318	59	15.33	+	3.85	2.01e-15
negative regulation of immune system process (GO:0002683)	384	17	4.47	+	3.81	0.0298
animal organ development (GO:0048513)	2961	131	34.45	+	3.8	1.05e-43
negative regulation of macromolecule metabolic process (GO:0010605)	2444	108	28.43	+	3.8	2.13e-33
calcium ion homeostasis (GO:0055074)	385	17	4.48	+	3.8	0.0308
protein complex assembly (GO:0006461)	1069	47	12.44	+	3.78	3.47e-11
protein complex biogenesis (GO:0070271)	1070	47	12.45	+	3.78	3.59e-11
positive regulation of cellular process (GO:0048522)	4808	211	55.94	+	3.77	1.28e-94
regulation of immune effector process (GO:0002697)	388	17	4.51	+	3.77	0.0341
divalent inorganic cation homeostasis (GO:0072507)	412	18	4.79	+	3.76	0.0184
multicellular organismal reproductive process (GO:0048609)	804	35	9.35	+	3.74	2.25e-07
negative regulation of metabolic process (GO:0009892)	2688	117	31.27	+	3.74	1.32e-36
cellular divalent inorganic cation homeostasis (GO:0072503)	392	17	4.56	+	3.73	0.039
cell-cell signaling (GO:0007267)	1131	49	13.16	+	3.72	1.42e-11
negative regulation of macromolecule biosynthetic process (GO:0010558)	1389	60	16.16	+	3.71	5.02e-15
cellular developmental process (GO:0048869)	3534	152	41.12	+	3.7	9.89e-53
multicellular organism reproduction (GO:0032504)	814	35	9.47	+	3.7	3.14e-07
immune system process (GO:0002376)	2512	108	29.23	+	3.7	2.52e-32
negative regulation of cellular biosynthetic process (GO:0031327)	1466	63	17.06	+	3.69	6.75e-16
protein complex subunit organization (GO:0071822)	1257	54	14.62	+	3.69	5.38e-13
cell differentiation (GO:0030154)	3462	148	40.28	+	3.67	2.68e-50
regulation of cellular component organization (GO:0051128)	2321	99	27	+	3.67	1.82e-28
negative regulation of gene expression (GO:0010629)	1597	68	18.58	+	3.66	2.44e-17
regulation of neuron differentiation (GO:0045664)	564	24	6.56	+	3.66	0.000565
regulation of cell projection organization (GO:0031344)	564	24	6.56	+	3.66	0.000565
negative regulation of biosynthetic process (GO:0009890)	1487	63	17.3	+	3.64	1.37e-15
cellular chemical homeostasis (GO:0055082)	661	28	7.69	+	3.64	4.64e-05
cellular metal ion homeostasis (GO:0006875)	475	20	5.53	+	3.62	0.00864
cellular lipid metabolic process (GO:0044255)	960	40	11.17	+	3.58	2.72e-08
signal transduction (GO:0007165)	4861	202	56.56	+	3.57	2.45e-82
regulation of vesicle-mediated transport (GO:0060627)	458	19	5.33	+	3.57	0.0201
response to stress (GO:0006950)	3263	135	37.96	+	3.56	2.94e-42
single-organism intracellular transport (GO:1902582)	532	22	6.19	+	3.55	0.00329
covalent chromatin modification (GO:0016569)	465	19	5.41	+	3.51	0.0249
behavior (GO:0007610)	545	22	6.34	+	3.47	0.0049
single-organism cellular localization (GO:1902580)	671	27	7.81	+	3.46	0.000252
regulation of biological quality (GO:0065008)	3487	140	40.57	+	3.45	5.06e-43
multi-organism process (GO:0051704)	2398	96	27.9	+	3.44	3.56e-25
protein localization to organelle (GO:0033365)	601	24	6.99	+	3.43	0.00178
cellular protein modification process (GO:0006464)	3118	124	36.28	+	3.42	1.32e-35
protein modification process (GO:0036211)	3118	124	36.28	+	3.42	1.32e-35
cellular response to DNA damage stimulus (GO:0006974)	731	29	8.5	+	3.41	0.000101
regulation of plasma membrane bounded cell projection organization (GO:0120035)	555	22	6.46	+	3.41	0.0066
cell division (GO:0051301)	481	19	5.6	+	3.4	0.0403
positive regulation of biological process (GO:0048518)	5400	213	62.83	+	3.39	4.61e-87
cell activation involved in immune response (GO:0002263)	610	24	7.1	+	3.38	0.00232
system development (GO:0048731)	4156	163	48.35	+	3.37	5.2e-53
metal ion homeostasis (GO:0055065)	537	21	6.25	+	3.36	0.0147
single organism signaling (GO:0044700)	5250	204	61.08	+	3.34	2.32e-78
signaling (GO:0023052)	5254	204	61.13	+	3.34	2.68e-78
negative regulation of cellular process (GO:0048523)	4291	166	49.92	+	3.33	9.6e-54
cell communication (GO:0007154)	5341	206	62.14	+	3.32	2.63e-79
lipid metabolic process (GO:0006629)	1205	46	14.02	+	3.28	1.02e-08
leukocyte activation involved in immune response (GO:0002366)	606	23	7.05	+	3.26	0.00764
immune effector process (GO:0002252)	1003	38	11.67	+	3.26	1.53e-06
multi-organism reproductive process (GO:0044703)	953	36	11.09	+	3.25	5.31e-06
regulation of ion transport (GO:0043269)	636	24	7.4	+	3.24	0.00483
macromolecule modification (GO:0043412)	3394	128	39.49	+	3.24	8.14e-35
cellular homeostasis (GO:0019725)	775	29	9.02	+	3.22	0.000353
negative regulation of biological process (GO:0048519)	4778	178	55.59	+	3.2	6.91e-58
response to biotic stimulus (GO:0009607)	842	31	9.8	+	3.16	0.000167
gamete generation (GO:0007276)	653	24	7.6	+	3.16	0.00765
regulation of nucleobase-containing compound metabolic process (GO:0019219)	4141	151	48.18	+	3.13	7.58e-43
innate immune response (GO:0045087)	659	24	7.67	+	3.13	0.00896
DNA metabolic process (GO:0006259)	777	28	9.04	+	3.1	0.00132
response to other organism (GO:0051707)	806	29	9.38	+	3.09	0.000804
cellular response to stimulus (GO:0051716)	6204	223	72.18	+	3.09	6.76e-88
macromolecular complex assembly (GO:0065003)	1448	52	16.85	+	3.09	2.65e-09
response to external biotic stimulus (GO:0043207)	809	29	9.41	+	3.08	0.000869
multicellular organism development (GO:0007275)	4745	170	55.21	+	3.08	6.21e-51
macromolecular complex subunit organization (GO:0043933)	1689	59	19.65	+	3	1.45e-10
regulation of cellular biosynthetic process (GO:0031326)	4362	152	50.75	+	3	9.23e-41
ion homeostasis (GO:0050801)	666	23	7.75	+	2.97	0.0362
regulation of biosynthetic process (GO:0009889)	4432	153	51.56	+	2.97	1.13e-40
defense response (GO:0006952)	1189	41	13.83	+	2.96	4.33e-06
cellular protein metabolic process (GO:0044267)	3698	127	43.02	+	2.95	3.31e-30
regulation of gene expression (GO:0010468)	4544	156	52.87	+	2.95	1.15e-41
sexual reproduction (GO:0019953)	787	27	9.16	+	2.95	0.00574
single-multicellular organism process (GO:0044707)	5539	190	64.44	+	2.95	5.28e-59
anatomical structure development (GO:0048856)	5073	173	59.02	+	2.93	2.94e-49
regulation of macromolecule metabolic process (GO:0060255)	6010	204	69.92	+	2.92	3.08e-67
regulation of nitrogen compound metabolic process (GO:0051171)	5811	197	67.61	+	2.91	1.89e-62
regulation of cellular metabolic process (GO:0031323)	6029	203	70.14	+	2.89	6.89e-66
single-organism developmental process (GO:0044767)	5350	180	62.24	+	2.89	5.62e-52
regulation of cellular macromolecule biosynthetic process (GO:2000112)	4063	136	47.27	+	2.88	2.77e-32
regulation of primary metabolic process (GO:0080090)	5976	200	69.53	+	2.88	2.19e-63
regulation of transcription, DNA-templated (GO:0006355)	3627	121	42.2	+	2.87	6.77e-27
regulation of nucleic acid-templated transcription (GO:1903506)	3651	121	42.48	+	2.85	1.27e-26
developmental process (GO:0032502)	5436	180	63.25	+	2.85	6.98e-51
regulation of macromolecule biosynthetic process (GO:0010556)	4169	138	48.5	+	2.85	1.75e-32
regulation of RNA biosynthetic process (GO:2001141)	3659	121	42.57	+	2.84	1.57e-26
chromosome organization (GO:0051276)	1009	33	11.74	+	2.81	0.000884
regulation of RNA metabolic process (GO:0051252)	3777	123	43.94	+	2.8	1.52e-26
single-organism metabolic process (GO:0044710)	3572	114	41.56	+	2.74	6.28e-23
regulation of metabolic process (GO:0019222)	6533	207	76.01	+	2.72	1.15e-63
protein metabolic process (GO:0019538)	4411	138	51.32	+	2.69	9.23e-30
cellular component assembly (GO:0022607)	2254	70	26.22	+	2.67	8.73e-11
immune response (GO:0006955)	1650	51	19.2	+	2.66	1.08e-06
single-organism biosynthetic process (GO:0044711)	1202	37	13.98	+	2.65	0.000625
cellular macromolecule localization (GO:0070727)	1341	41	15.6	+	2.63	0.000133
cellular protein localization (GO:0034613)	1331	40	15.49	+	2.58	0.000324
response to stimulus (GO:0050896)	7844	233	91.26	+	2.55	5.62e-80
multicellular organismal process (GO:0032501)	6633	195	77.17	+	2.53	2.27e-50
single-organism transport (GO:0044765)	2521	74	29.33	+	2.52	2.07e-10
single-organism localization (GO:1902578)	2646	77	30.79	+	2.5	7.74e-11
system process (GO:0003008)	1822	53	21.2	+	2.5	3.79e-06
cellular component organization (GO:0016043)	5242	152	60.99	+	2.49	8.79e-31
cellular localization (GO:0051641)	2104	61	24.48	+	2.49	1.39e-07
cellular component biogenesis (GO:0044085)	2508	72	29.18	+	2.47	1.61e-09
vesicle-mediated transport (GO:0016192)	1748	49	20.34	+	2.41	6.62e-05
cellular component organization or biogenesis (GO:0071840)	5457	152	63.49	+	2.39	1.13e-28
proteolysis (GO:0006508)	1301	36	15.14	+	2.38	0.0118
organonitrogen compound metabolic process (GO:1901564)	5458	151	63.5	+	2.38	5.4e-28
protein localization (GO:0008104)	1920	53	22.34	+	2.37	2.35e-05
macromolecule localization (GO:0033036)	2214	60	25.76	+	2.33	3.12e-06
establishment of protein localization (GO:0045184)	1498	40	17.43	+	2.3	0.00688
establishment of localization in cell (GO:0051649)	1647	43	19.16	+	2.24	0.0045
nucleobase-containing compound biosynthetic process (GO:0034654)	2944	75	34.25	+	2.19	1.55e-07
heterocycle biosynthetic process (GO:0018130)	3014	76	35.07	+	2.17	1.76e-07
aromatic compound biosynthetic process (GO:0019438)	3017	76	35.1	+	2.17	1.84e-07
organic cyclic compound biosynthetic process (GO:1901362)	3152	78	36.67	+	2.13	2.13e-07
localization (GO:0051179)	5375	133	62.54	+	2.13	7.78e-18
cellular macromolecule metabolic process (GO:0044260)	6946	167	80.81	+	2.07	1.79e-25
nucleic acid-templated transcription (GO:0097659)	2587	61	30.1	+	2.03	0.000412
single-organism cellular process (GO:0044763)	9841	232	114.5	+	2.03	1.83e-56
RNA biosynthetic process (GO:0032774)	2597	61	30.21	+	2.02	0.000473
establishment of localization (GO:0051234)	4499	105	52.34	+	2.01	3.01e-10
transcription, DNA-templated (GO:0006351)	2586	60	30.09	+	1.99	0.000971
macromolecule metabolic process (GO:0043170)	7685	177	89.41	+	1.98	4.22e-26
cellular biosynthetic process (GO:0044249)	4655	107	54.16	+	1.98	3.98e-10
cellular nitrogen compound biosynthetic process (GO:0044271)	3455	79	40.2	+	1.97	6.96e-06
regulation of cellular process (GO:0050794)	10473	239	121.85	+	1.96	1.59e-60
organic substance biosynthetic process (GO:1901576)	4742	108	55.17	+	1.96	5.17e-10
biosynthetic process (GO:0009058)	4809	109	55.95	+	1.95	4.98e-10
transport (GO:0006810)	4368	95	50.82	+	1.87	7.33e-07
regulation of biological process (GO:0050789)	11142	241	129.63	+	1.86	1.35e-57
primary metabolic process (GO:0044238)	9069	194	105.51	+	1.84	4.3e-27
nitrogen compound metabolic process (GO:0006807)	8534	182	99.29	+	1.83	5.46e-23
cellular metabolic process (GO:0044237)	8936	190	103.97	+	1.83	2.59e-25
organic substance metabolic process (GO:0071704)	9416	200	109.55	+	1.83	7.89e-29
cellular macromolecule biosynthetic process (GO:0034645)	3659	76	42.57	+	1.79	0.00111
biological regulation (GO:0065007)	11745	242	136.65	+	1.77	5.75e-54
macromolecule biosynthetic process (GO:0009059)	3723	76	43.32	+	1.75	0.00226
organelle organization (GO:0006996)	3097	63	36.03	+	1.75	0.0407
metabolic process (GO:0008152)	9878	200	114.93	+	1.74	1.94e-25
nucleic acid metabolic process (GO:0090304)	3956	78	46.03	+	1.69	0.00605
nucleobase-containing compound metabolic process (GO:0006139)	4512	88	52.5	+	1.68	0.00121
cellular aromatic compound metabolic process (GO:0006725)	4722	91	54.94	+	1.66	0.00112
organic cyclic compound metabolic process (GO:1901360)	4945	95	57.53	+	1.65	0.00056
single-organism process (GO:0044699)	12686	241	147.6	+	1.63	3.11e-44
heterocycle metabolic process (GO:0046483)	4685	89	54.51	+	1.63	0.0033
cellular nitrogen compound metabolic process (GO:0034641)	5120	92	59.57	+	1.54	0.0233
cellular process (GO:0009987)	14882	242	173.15	+	1.4	1.92e-29
biological_process (GO:0008150)	17272	244	200.95	+	1.21	2.29e-17
